1 **Full title : An inflammation-derived and clinical-based**  
2 **model for ischemic stroke recovery**

3 **Short title : A machine learning-based model for post-stroke**  
4 **prediction**

5 Jiao Luo<sup>1,2†</sup>, You Cai<sup>3†</sup>, Peng Xiao<sup>1</sup>, Changchun Cao<sup>1</sup>, Meiling Huang<sup>2</sup>, Xiaohua  
6 Zhang<sup>1</sup>, Jie Guo<sup>2</sup>, Yongyang Huo<sup>1</sup>, Qiaoyan Tang<sup>1</sup>, Liuyang Zhao<sup>1,2,4</sup>, Jiabang Liu<sup>3</sup>,  
7 Yaqi Ma<sup>2,4</sup>, Mingchao Zhou<sup>2\*</sup>, Yulong Wang<sup>2\*</sup>

8 1 Department of Rehabilitation Medicine, Dapeng New District Nan'ao People's  
9 Hospital, Rehabilitation Branch of the First Affiliated Hospital of Shenzhen  
10 University, Shenzhen, China.

11 2 Department of Rehabilitation, Shenzhen Second People's Hospital, the First  
12 Affiliated Hospital, Shenzhen University School of Medicine, Shenzhen, China.

13 3 Shenzhen Institute of Translational Medicine, the First Affiliated Hospital of  
14 Shenzhen University, Shenzhen Second People's Hospital, Shenzhen, China.

15 4 Department of Rehabilitation Medicine, Shandong University of Traditional  
16 Chinese Medicine, Jinan, Shandong Province, PR China.

17 \* Corresponding author. E-mail: [ylwang66@126.com](mailto:ylwang66@126.com) (Yulong Wang);  
18 [zhoumc06@email.szu.edu.cn](mailto:zhoumc06@email.szu.edu.cn) (Mingchao Zhou)

19 † These authors contributed equally, and each has the right to list themselves first  
20 in author order on their curriculum vitae.

21 The total word count of the manuscript was 9406.

## 1 **Abstract**

## 2 **Background**

3 Neuroinflammatory responses reflecting disease progression are  
4 believed to be closely associated with the severity of prognosis in post-  
5 stroke.

## 6 **Purpose**

7 This study developed a combined predicted model of inflammation-  
8 derived biomarkers and clinical-based indicators using machine learning  
9 algorithms for differentiation of the functional outcome in patients with  
10 subacute ischemic stroke.

## 11 **Methods**

12 Clinical blood samples and patient data from individuals with subacute  
13 ischemic stroke were collected at admission. Based on activities of daily  
14 living assessments followed by a 3-month recovery, patients were  
15 categorized into two groups: those with little effective recovery (LE) and  
16 those with obvious effective recovery (OE). Serum samples underwent  
17 proteomic testing for initial candidates. Subsequently, multidimensional  
18 validation of candidates in models of ischemia-reperfusion at protein and  
19 mRNA levels was performed. *T*-test, Receiver Operating Characteristic  
20 (ROC), and LASSO analysis in an additional cohort were performed to  
21 confirm the clinical variables and candidate biomarkers in the  
22 discriminatory sensitivity and specificity between the LE and OE groups.  
23 Finally, models were developed based on candidates in the training  
24 dataset and predicted stroke recovery outcomes in another new dataset

1 using ten standard two-categorical variable algorithms in machine  
2 learning.

### 3 **Results**

4 We identified higher tissue inhibitor metalloproteinase-1 (TIMP1) and  
5 LGALS3 levels were positively correlated with the severity of prognosis  
6 after ischemic stroke rehabilitation. TIMP1 (AUC=0.904, 0.873) and  
7 LGALS3 (AUC=0.995, 0.794) were confirmed to address superior  
8 sensitivity and specificity in distinguishing ischemic stroke from healthy  
9 control and LE group from OE group. The TIMP1 and Lgals3 expression  
10 exhibited an evident increase in microglia following ischemia-reperfusion.  
11 In addition, inflammation-derived biomarkers (TIMP1, LGALS3)  
12 coupled with clinical-based indicators (HGB, LDL-c, UA) were built in a  
13 combined model with random forest to differentiate OE from LE in 3-  
14 month follow-up with high accuracy (AUC = 0.8).

### 15 **Conclusion**

16 Our findings provided evidence supporting the critical prognostic  
17 potential and risk prediction of inflammation-derived biomarkers after  
18 ischemic stroke rehabilitation in complementary to current clinical-based  
19 parameters.

20 **Keywords:** Ischemic stroke, recovery biomarkers, TIMP1, LGALS3,  
21 neuroinflammation.

## 1 **1. Introduction**

2 Ischemic stroke, which accounts for 87% of all strokes, is a leading  
3 cause of death and long-term disability worldwide. Approximately 1300  
4 million surviving patients with ischemic stroke suffer from different  
5 degrees of disability, which is a substantial burden on the aging  
6 population of China<sup>1</sup>. Rapid reperfusion with thrombolysis and/or  
7 thrombectomy for ischemic stroke continues to advance<sup>2</sup>, and more  
8 attention is focused on how to improve stroke rehabilitation and decline  
9 the disability rate. Potential biomarkers of stroke recovery provide  
10 knowledge of both therapeutic targets and correlate with the disease  
11 severity of rehabilitation. However, there are no biomarkers that have  
12 addressed sufficient specificity, sensitivity, and reliability to be applied in  
13 the clinical management of patients with stroke, thus highlighting the  
14 need for additional study.

15 Circulating molecules serve as clinically applicable indicators of  
16 disease state and progression, reflecting underlying molecular/cellular  
17 processes that can be utilized to predict treatment response and stroke  
18 recovery. Those molecules may encompass biological markers (blood,  
19 genetics), neurological repair markers (electrophysiological activity,  
20 tissue remodeling, or neuroinflammation), and clinical test indices (blood  
21 routine or urine routine). Multilevel omics have yielded a wealth of  
22 promising biomarkers, which serve as clinically relevant indicators for  
23 disease state and progression. It has been reported that high-density  
24 lipoproteins<sup>3</sup>, phenylacetylglutamine<sup>4</sup>, and serum cytokines<sup>5</sup> could

1 represent independent prognostic markers and inform on stroke  
2 recuperation. The variety of promising predictors regarding which ones  
3 possess superior predictive value is also confusing. The emergence of  
4 machine learning algorithms may offer non-invasive approaches to  
5 further screen for more valuable variables and construct combined  
6 models, effortlessly incorporating a vast number of variables. These  
7 characteristics make machine learning remarkably efficient and shiny to  
8 apply in the medical domain.

9 The inflammatory response has been implicated in the development of  
10 brain ischemic pathology and plays a pivotal role in tissue remodeling  
11 and repair during stroke recovery. The acute stage of cerebral ischemic  
12 injury and reperfusion, lasting approximately one week, triggers an  
13 inflammatory cascade mainly characterized by inflammatory cell  
14 infiltration, inflammatory mediators release, blood-brain barrier damage,  
15 extracellular matrix degradation, oxidative stress, and excitotoxicity.  
16 These factors further contribute to neurovascular unit (NVU) damage and  
17 death. In the subacute stage (within six months) after ischemic stroke,  
18 microglia play both neurotoxic and protective roles that account for the  
19 complexity of the immune response<sup>6</sup>. Ischemic stimulation leads to the  
20 alterations of microglia activation and proliferation with M1-liker  
21 polarization releasing pro-inflammatory factors such as TNF- $\alpha$ , NOS,  
22 CXCL10, MMP9, and M2-liker polarization releasing anti-inflammatory  
23 factors such as IL-10, Arginase-1, CD206, IL-4, IL-13, and IL-33<sup>7</sup>.  
24 Preclinical studies have demonstrated significant changes in specific

1 genes of different types of cells within the NVU following middle  
2 cerebral artery occlusion (MCAO) through single-cell sequencing  
3 analysis, among which 60% are microglia-specific genes<sup>8,9</sup>. Targeting the  
4 central immune role of microglia may hold promise as a critical  
5 therapeutic approach for regulating neuroimmunity in post-stroke  
6 rehabilitation.

7 In this study, we hypothesized that ischemic stroke induces  
8 characteristic molecular changes associated with inflammatory responses  
9 and predicts functional recovery from stroke events. Thus, we aimed to  
10 develop a combined model of inflammation-derived biomarkers and  
11 clinical-based parameters model using machine learning algorithms to  
12 predict ischemic stroke rehabilitation.

## 13 **2. Methods**

### 14 **2.1 Study design and participants**

15 This study was conducted at the Rehabilitation Department, Shenzhen  
16 Second People's Hospital. All the cases of 52 male patients with ischemic  
17 stroke and 20 male healthy controls were collected from June 2020 to  
18 June 2022. The recovery effect of the enrolled patients with ischemic  
19 stroke in daily activity ability was assessed by the Longshi Scale and  
20 Barthel index (BI) after the patients had received conventional  
21 rehabilitation for 3 months. Longshi Scale, a supplement for modified  
22 Rankin Scale (mRS) and BI, divided disabled people into Bedridden,  
23 Domestic, and Community groups according to the person's daily activity  
24 ability and activity range<sup>10</sup>. The group of little effect recovery (LE)

1 defined in a status of from Bedridden (at admission) to Bedridden (3  
2 months after discharge) group and obvious effect (OE) recovery from  
3 Bedridden (at admission) to Domestic group (3 months after discharge)  
4 were assessed by the Longshi Scale as previously described<sup>10</sup>. Patients  
5 with severe systematic or mental diseases, other causes of brain injury, or  
6 sharp, blunt direct action on the head caused by organic brain tissue  
7 damage were excluded from this study.

8 In brief, 30 LE patients with poor prognosis and 22 OE patients with  
9 good prognosis were qualified, together with 18 healthy controls.  
10 Subjects were divided into discovery groups, validation groups, and new  
11 test prediction groups, schematically summarized in Figure 1.

## 12 **2.2 Collection of serum samples**

13 The blood samples of patients enrolled were obtained on the second  
14 day after hospitalization at the Department of Rehabilitation Medicine.  
15 The samples were promptly processed according to the standardized  
16 protocol recommended by the HUPO Plasma Proteome Project. Briefly,  
17 blood was drawn into plastic K2EDTA tubes (BD), gently inverted  
18 manually ten times, and stood at room temperature for 1 hour.  
19 Subsequently, the blood samples were centrifuged at 4°C and 1000 × g  
20 for 10 minutes, and serum sample aliquots were stored at -80°C until  
21 further proteomic analysis or ELISA.

## 22 **2.3 LC-MS/MS and bioinformatic analysis of serum proteomic**

23 The serum samples of a discovery cohort were transported with dry ice  
24 to Jingjie PTM BioLab (Hangzhou) Co. Ltd. for standardized proteomic

1 sample pretreatment and four-dimensional label-free quantification of  
2 Liquid chromatography-tandem mass spectrometry analysis (LC-MS/MS)  
3 as the previous described<sup>11</sup>. After removal of high-abundant proteins  
4 using Pierce™ Top 14 Abundant Protein Depletion Spin Columns Kit  
5 (Thermo Scientific), trypsin digestion of the proteins was dissolved in  
6 solvent A (0.1% formic acid in water) and separated with a gradient  
7 solvent B (0.1% formic acid in acetonitrile). The gradient settings were:  
8 4%-6% solvent B in 2 min; 6%-24% solvent B over 68 min; 24%-32%  
9 solvent B in 14 min; 80% solvent B in 3 min; then holding at 80% for the  
10 last 3 min, all at a constant flow rate of 300 nL/min on a nanoElute ultra  
11 high-performance liquid chromatography (UHPLC) system (Bruker  
12 Daltonics). The peptides were subjected to a capillary source followed by  
13 the timsTOF Pro (Bruker Daltonics) mass spectrometry (1.60 kV  
14 electrospray voltage) in parallel accumulation serial fragmentation  
15 (PASEF) mode. Precursors and fragments were conducted an MS/MS  
16 scan (100 to 1700 m/z) at the TOF detector. Precursors with charge states  
17 (0 to 5) were selected for fragmentation, and 10 PASEF-MS/MS scans  
18 were acquired per cycle. The dynamic exclusion was set to 30 seconds.

19 The MS/MS data were retrieved by the Proteome Discoverer  
20 (v2.4.1.15). A human database was searched by  
21 Homo\_sapiens\_9606\_PR\_20201214.fasta (75777 protein sequences). The  
22 decoy database antilibrary was used to reduce the false-positive rate  
23 (FPR). The FDR was adjusted to <1%, and the minimum score for  
24 modified peptides was set to >40. Differentially expressed proteins (DEPs)



1 were considered separately with  $\log_2|\text{foldchange}| \geq 1.0$  between the LE,  
2 OE, and HC groups. Based on the protein sequence alignment method,  
3 the protein domain functions were defined by InterProScan  
4 (<http://www.ebi.ac.uk/interpro/>). Principal Component Analysis (PCA)  
5 was performed using the FactoMineR (version 2.4) and factoextra  
6 (version 1.0.7) packages in R to reduce dataset dimensionality and  
7 visualize relationships among variables and samples.

## 8 **2.4 Total transcriptome sequencing and bioinformatics analysis**

9 The transcriptome sequencing of cerebral ischemic stroke was  
10 conducted by reusing a previously published study<sup>12, 13</sup>, in which our co-  
11 first author (You Cai, PhD) played a key role. The transcriptome  
12 sequencing data has been published and can be found in the Genome  
13 Sequence Archive with accession numbers CRA001143 and CRA001432.

14 All expressed and differentially expressed genes (DEGs) were  
15 determined based on  $|\log_2\text{FoldChang}| > 0$  and a  $p < 0.05$ . Overlaps of the  
16 DEPs of plasma proteomic and DEGs in mice with middle cerebral artery  
17 occlusion (MCAO) at day 3 and day 7 were obtained with a Venn  
18 diagram. Protein-protein interaction of the overlaps was visualized and  
19 analyzed with Cytoscape. Gene Ontology (GO) annotation analysis was  
20 executed with the clusterProfiler R package (version 4.2.2) applying  
21 parameters such as 'pAdjustMethod = BH, p-value < 0.05, and simplify  
22 cutoff = 0.5'. At the same time, default settings were maintained for the  
23 remaining parameters. ROC analysis was performed using the pROC R  
24 package (version 1.18.0).

## 1 **2.5 MCAO modeling and 2,3,5-Triphenyl Tetrazolium Chloride (TTC)** 2 **Staining**

3 Male C57BL/6J mice (6-8weeks) were purchased from Guangdong  
4 Weitong Lihua Experimental Animal Technology Co., Ltd. Guangzhou,  
5 China, and housed under specific pathogen-free conditions with  
6  $22^{\circ}\text{C} \pm 2^{\circ}\text{C}$  and a 12-light/dark cycle. All procedures were approved by  
7 the Experimental Animal Welfare and Ethics Committee of Shenzhen  
8 Institute of Translational Medicine, Shenzhen Second People's Hospital.

9 A silicon-coated tip (Jialing Biotech, China) and C57BL/6 male mice  
10 (25-30 g) at 12 weeks were applied to establish a mouse model of  
11 ischemic stroke, according to a previous study<sup>13</sup>. In brief, mice were  
12 anesthetized with 1-2% isoflurane and maintained using Small Animal  
13 Anesthesia Machine R500 (RWD Life Science, China). During MCA  
14 occlusion surgery, a silicon-coated tip was introduced from the proximal  
15 end of the external carotid artery to the distal end of the external carotid  
16 artery. The tip was kept in place for 1 hour (occlusion), then removed and  
17 sutured (refill). The sham operation mice were treated with similar  
18 surgery, except the tip was not inserted. After mice regained full  
19 consciousness, neurological severity scores were assessed using a five-  
20 point scale according to a previous study<sup>14</sup>.

21 TTC stain was performed to evaluate the ischemic areas of the MCAO  
22 model. Mice were anesthesia with intraperitoneal injection of 1%  
23 pentobarbital sodium 24 hours after the MCAO surgery. Then, the intact  
24 brain was isolated, rapidly frozen at  $-20^{\circ}\text{C}$  for 10 min, placed in a mouse

1 meningeal capsule, and prepared for seven coronal (1mm ) per mouse.  
2 Subsequently, brain sections were stained with 2% TTC solution (Cat.  
3 T8877, Sigma-Aldrich) at 37°C away from light for 15 min.

## 4 **2.6 Cell culture and Oxygen-glucose deprivation/ reoxygenation** 5 **(OGD/R)**

6 The human brain microvascular endothelial cell line (hCMEC/D3) was  
7 purchased from Sepkon (iCell-h070). It was cultured normally in  
8 Endothelial Cell Medium (ECM) (Cat. 1001, ScienCell) supplemented  
9 with Endothelial Cell Growth Supplement (ECGS, Cat #1052, ScienCell)  
10 and 5% fetal bovine serum (FBS). The mouse microglial cell line (BV2)  
11 was presented from Northeastern University and cultured in  
12 DMEM/HIGH glucose medium containing 10% FBS. In control, the two  
13 cell lines were cultured in a conventional medium and placed in an  
14 incubator with an atmosphere of 5% CO<sub>2</sub>/95% air.

15 For OGD/R, the cells were seeded into a 6-well plate at  $3 \times 10^5$  /well  
16 and grew approximately 70-80% confluency; the medium was replaced  
17 by MEM medium without glucose (Cat#A1443001, Gibco). Then, cells  
18 were placed into a humidified 37°C incubator with a gas mixture of 1%  
19 O<sub>2</sub>, 5% CO<sub>2</sub>, and 94% N<sub>2</sub> at the control of ProOx C21 (Biospherix,  
20 USA). After 6 hr exposure to hCMEC/D3 and 4 hr exposure to BV2, the  
21 cells were cultured with reperfusion of oxygen and nutrients.

## 22 **2.7 Real-time PCR Analysis**

23 The cortex tissues or cells were collected, and total RNA was extracted  
24 with TRIzol reagent (Cat.15596026, Invitrogen) following the

1 manufacturer's instructions. One  $\mu\text{g}$  of total RNA from each sample was  
2 reverse transcribed to cDNA with RevertAid RT Reverse Transcription  
3 Kit (Cat.K1691, Thermo Scientific™). qPCR was performed with SYBR  
4 Green Mix (Cat.QPK-201, Toyobo). Results were collected with Bio-Rad  
5 CFX Connect Real-Time system and presented as linearized values  
6 normalized against  $\beta$ -actin in triplicate. Suzhou Hongxun Biotechnology  
7 synthesized the primers (Table S1).

## 8 **2.8 Immunofluorescence of brain tissue**

9 Mice subjected to MCAO operation on day 7 were perfused with 0.9%  
10 saline flush and 4% paraformaldehyde (PFA) after cardiac blood  
11 collection. Intact brain tissue was isolated and fixed with 4% PFA for 24  
12 h, then dehydrated with 20% sucrose and 30 % sucrose. Brain tissue was  
13 placed in O.C.T. media and froze at  $-20^{\circ}\text{C}$ . Contiguous coronal sections  
14 taken across the hippocampus were performed for double-  
15 immunofluorescence using a rabbit polyclonal antibody for Iba1  
16 (WFD6884, 1:500) and Timp1(sc-21734,1:100) or Galectin3 (sc-32790,  
17 1:100) mouse monoclonal antibody. The immunofluorescence in brain  
18 slices from the cortex and the hippocampus was visualized by confocal  
19 microscopy (KEYENCE BZ-X, Japan).

## 20 **2.9 Validation study of targeted biomarkers with ELISA analysis**

21 For the validation study, 100  $\mu\text{L}$  serum was separated from the  
22 collected sample. The levels of targeted proteins in serum were detected  
23 according to the manufacturer's instruction by corresponding kits of  
24 enzyme-linked immunosorbent assays, such as TIMP1 (RDR-TIMP1-Hu,

1 Reddot Biotech) and TGFB1 (EK981, MULTI SCIENCES) LGALS3  
2 (EK1126, MULTI SCIENCES). Serum samples were diluted by a factor  
3 of 10.

## 4 **2.10 Machine learning in constructing a predictive model integrating** 5 **biomolecules and clinical indicators**

6 The Lasso algorithm was employed for the initial screening of  
7 predictor variables for machine learning. Variables identified by Lasso  
8 underwent further screening, with those exhibiting high covariance  
9 excluded one by one using logistic regression to identify features with p-  
10 values < 0.05. A total of 10 different machine learning classification  
11 algorithms for distinguishing dichotomous variables were utilized,  
12 including Naive Bayesian Classifier (nb), Decision Tree Algorithm  
13 (C5.0, AdaBag, and Random Forest), Support Vector Machine  
14 (svmRatial, svmPloy, and svmLinear), Logistic Regression (glmnet), K-  
15 Nearest Neighbor (kkn), Artificial Neural and Network (nnet). These  
16 algorithms were integrated within the caret (version 6.0.92) (74) R  
17 package.

## 18 **2.11 Statistical Analysis**

19 The statistical analysis is detailed in the Data Processing and Analysis  
20 sections. All other clinical and laboratory data statistical analyses were  
21 conducted using GraphPad Prism (v8.0). Results of normally distributed  
22 parameters are expressed as mean  $\pm$  SEM. Data were compared by a two-  
23 tailed unpaired Student's *t*-test or one-way analysis of variance for  
24 multiple comparisons. When necessary, experimenters were blinded to

---

1 group allocation prior to data acquisition. Significance levels of p-values  
2 are provided in the corresponding figure legends. In general, differences  
3 were considered statistically significant at *p-values* < 0.05 in all cases.  
4 “\*” represents  $p < 0.05$ , “\*\*” represents  $p < 0.01$ , “\*\*\*” represents  $p <$   
5 0.001, and “\*\*\*\*” for *p-values* < 0.0001.

### 6 **3. Result**

#### 7 ***3.1 Inflammation-derived biomarkers robust increasing after ischemia-*** 8 ***reperfusion injury***

9 To obtain reliable candidates for differentiation severity of functional  
10 outcome, serum proteomics of patients with ischemic stroke and RNA  
11 sequence of MCAO animals were applied and integrated to screen  
12 differential molecules in this study as schematically summarized in  
13 Figure 2A. 5 patients with LE, 5 patients with OE, and 6 HC were  
14 selected as listed in Table 1 and Table S2. The serum was collected from  
15 the enrolled and subjected to tryptic digest with high abundance removal,  
16 followed by proteomics with LC-MS/MS analysis. Based on a shotgun  
17 proteomics approach, 1533 proteins were identified from 9422 unique  
18 peptides with a maximum false positive rate (FPR)<1%, among which  
19 948 proteins (Figure 2B) at a quantifiable level were used for principal  
20 component analysis (PCA) (Figure 2C). The detailed annotation  
21 information of 1533 proteins were shown in Table S2. 194 DEPs varied in  
22 the LE compared to the HC and 174 DEPs in the OE compared to the HC  
23 according to  $p\text{-value} < 0.05$  (Table S3). On the other hand, the RNA  
24 sequence of the ischemic core of the cortex in mice with MCAO at Day 3

---

1 and Day 7 was analyzed, and DEGs were taken  $p$ -value  $< 0.05$  as the  
2 standard (Table S4). We found 27 overlaps (Figure 2D) between the DEPs  
3 and DEGs. According to the standard of more than 5 interactions, 8 target  
4 molecules of TIMP1, LGALS3, VIM, TGFB1, MYH9, CSF1R, PTPRC,  
5 and GSN were noticed following protein interaction network analysis  
6 (Figure 2E). Next, in the biological process classification of 27 overlaps,  
7 terms directly related to the 8 most important protein enriched in negative  
8 regulation of cell adhesion, regulation of cell morphogenesis, leukocyte  
9 proliferation, T cell activation, plasma membrane organization, actin  
10 cytoskeleton reorganization, tissue remodeling, glial cell differentiation  
11 (Figure 2F and Table S5), which indicated that inflammation response  
12 was enhanced in the subacute ischemic stroke.

13 Furthermore, the 8 target molecules were validated with qPCR in vitro  
14 and vivo (Table S6), flow chart shown in Figure 3A. Morphological  
15 observation showed that hCMEC/D3 atrophied compared with the control  
16 group after OGD 6 hours, and the proliferation was inhibited, followed by  
17 24 hours of reoxygenation (Figure 3B). The qPCR results showed a  
18 significant increase of *TIMP1*, *MYH9*, *TGFB1*, *VIM*, and *LGALS3* mRNA  
19 (Figure 3C) and no significant change of *CSF1R* and *GSN* mRNA (Figure  
20 S1A) in hCMEC/D3 with OGD/R treatment. Meanwhile, the MCAO  
21 mice were established and confirmed with TTC straining (Figure 3D).  
22 mRNA change in the ischemic core of the cortex isolated from mice with  
23 MCAO on day 3 and day 7 was detected by qPCR. Data showed only the  
24 changes of *Timp1*, *Tgfb1*, and *Lgals3* mRNA (Figure 3E) were consistent



1 as in the hCMEC/D3 cells and apparent up-regulation, *Csf1r*, *Gsn*, *Myh9*,  
2 *Ptpnc*, and *Vim* mRNA without significant expression were shown in  
3 Figure S1B.

4 TIMP1 and LGALS3, recently served as novel inflammatory factors,  
5 have a novel role in immune regulation, inspiring attention and  
6 exploration. Hence, we detected the changes of *Timp1* and *Lgals3*  
7 expression in brain microglia by IF staining. In an immunofluorescence  
8 brain of mice with MCAO on 7 days, we found that the expressions of  
9 *Timp1* and *Lgals3* increased robustly after mice with ischemia-  
10 reperfusion injury, especially in the ischemic core of the cortex (Figure  
11 4A and 4F). *Iba1* is one of the classic markers of microglia activation. A  
12 remarkable increase was observed in *Iba1* expression, which suggested  
13 that the microglia activation surged in ischemic brain tissue, including the  
14 ischemic penumbra cortex, hippocampus, striatum, and hypothalamus.  
15 The amplifying image for the corresponding area in Figure 4A showed  
16 that most TIMP1 and *Iba1* were colocalized in the ischemic cortex  
17 (Figure 4B-C) and hippocampus (Figure 4D-E), as well as the  
18 colocalization of *Lgals3* and *Iba1* (Figure 4G-J). Therefore,  
19 multidimensional verification of candidate expression drew attention to  
20 TIMP1, LGALS3, and TGFB1, closely related to inflammatory response  
21 and prognosis.

### 22 **3.2 Biomarker validation by ELISA and ROC analysis**

23 Furthermore, we conducted an ELISA analysis to investigate the serum  
24 protein level of TIMP1, LGSAS3, and TGFB1 in an enlarged clinical



1 sample. This analysis included 15 patients with LE and 11 patients with  
2 OE who suffered from ischemic stroke events within 3 months and 18  
3 healthy controls. Detailed demographic information and primary ADL  
4 assessments for these two outcome groups are presented in Table S7 and  
5 Figure S2A-B. Age analysis revealed no significant difference between  
6 the healthy controls and stroke patients, while the mean age of the OE  
7 group (mean=63.27 ± 2.711) was lower than the LE group (mean=69.80  
8 ± 2.322) (Figure 5A). ELISA data (Table S7) showed that the TIMP1 and  
9 LGALS3 levels significantly increased after ischemic stroke; additionally,  
10 higher serum TIMP1 and LGALS3 levels during the subacute phase of  
11 ischemic stroke were associated with greater severity in ADL activities  
12 (Figure 5B-C). However, no difference was observed in TGFB1 levels  
13 among the groups (Figure 5D). The lack of association between  
14 circulating TGFB1 levels and function outcomes of stroke with ADL  
15 assessment is hardly controversial<sup>15</sup>; TGFB1 change was not considered  
16 in the following study.

17 Linear regression analysis was performed to rule out the effect of age  
18 on candidate protein levels. Correlations between TIMP1, LGALS3  
19 levels and age using scatter plots depicted by trend lines shown as red  
20 dashed lines in Figure 5E and Figure 5F, separately. The Pearson's  
21 correlation coefficient (R) values, along with their corresponding *p*-  
22 values, were displayed in green text on each trend line. All R values were  
23 less than 0.3 with *p*-values greater than 0.05, indicating no significant  
24 linear relationship between changes in TIMP1, LGALS3 levels and age.

1 Furthermore, Receiver Operating Characteristic (ROC) analysis were  
2 addressed to evaluate the discriminatory sensitivity and specificity  
3 between individuals with Stroke and Control. This step, depicted in green,  
4 represents optimal discriminative measures indicated by black dots on the  
5 ROC curve. Notably, TIMP1 (AUC = 0.904) and LGALS3 (AUC = 0.995)  
6 exhibited superior sensitivity (Figure 5G-H). We further examined the  
7 discriminatory sensitivity towards distinguishing LE/OE individuals,  
8 yielding AUC values of TIMP1 (0.873) and LGALS3 (0.794) more than  
9 0.75 (Figure 5I-J), which suggested reasonable sensitivity and accuracy.  
10 These findings highlight that both TIMP1 and LGALS3 hold promise as  
11 reliable and practical biomarkers for predicting ischemic stroke  
12 rehabilitation.

### 13 ***3.3 Develop a combined prognosis panel for stroke rehabilitation***

14 To evaluate clinical-based indicators for risk prediction in the subacute  
15 recovery of ischemic stroke, we collected multiple clinical data from 15  
16 patients with LE and 11 patients with OE, including ADL assessment, age,  
17 grip strength, blood routine, urine routine, eight items of liver function,  
18 six items of blood lipids, six items of electrolytes, and 6 items of kidney  
19 function. In this step of the analysis, ADL recovery of the LE (Longshi  
20 Scale from Bedridden group to Bedridden group, BI from 23.67 to 25.67)  
21 and OE (Longshi Scale from Bedridden group to Domestic group, BI  
22 range from 30.91 to 55.45) groups presented noticeable difference (Table  
23 2 and Figure S2A-B). Clinical test index data revealed significant  
24 differences by *t*-test in 9 clinical indicators such as hemoglobin (HGB),

1 erythrocyte count (RBC), hematocrit, coefficient of variation of red blood  
2 cell distribution width (RDW-CV), low-density lipoprotein cholesterol  
3 (LDL-c), standard deviation of red blood cell distribution width (RDW-  
4 SD), uric acid (UA), total cholesterol (Cho) and albumin (ALB) as shown  
5 in Figure 6A and Table S8. Meanwhile, ROC analysis revealed that the  
6 area under curve (AUC) of 14 indicators exceeded 0.7, indicating  
7 excellent sensitivity and specificity in discriminating between LE/OE  
8 individuals. Among them, 9 out of the total 14 indicators were depicted in  
9 Figure 6B, exhibiting consistency with the indicators derived from the *t*-  
10 test analysis. Additionally, Figure S2C illustrated the AUC values for the  
11 remaining 5 indicators (age, lymphocyte count, lymphocyte ratio, Mean  
12 erythrocyte hemoglobin concentration, viscose silk). The AUC results in  
13 the graph indicate that a yellow background represents a positive  
14 correlation with good prognosis, while a red background represents a  
15 negative correlation. Data indicated that higher levels of HGB, RBCs,  
16 hematocrit, UA, and ALB were positively associated with good prognosis,  
17 while higher RDW-CV LDL-c RDW-SD, and Cho levels were negatively  
18 associated with good prognosis. The *t*-test and ROC analysis conducted  
19 above had demonstrated the reliability of the data quality in the enrolled  
20 patients. Consequently, these 9 clinical-based indicators were screened  
21 out for variable screening and modeling by machine learning to  
22 accurately predict prognosis of stroke recovery.

23 In this study, we aimed to develop a combined prognostic model based  
24 on inflammation-derived biomarkers and filtered clinical-indicators for

1 distinguishing subacute prognostication outcomes among patients with  
2 subacute ischemic stroke. The process and steps of establishing the  
3 prediction model using machine learning methods was illustrated in  
4 Figure 7A. The variable screening of machine learning was performed by  
5 LASSO analysis and Logistic regression, including those 9 clinical  
6 indicators ( $p$ -value  $< 0.05$  in  $t$ -test and AUC  $> 0.7$  in ROC) and 2  
7 validated biomarkers (TIMP1 and LGALS3). Figures 7B-C present the  
8 coefficients, lambda correlation plot of LASSO filtered variables, and  
9 Lambda value plot of LASSO analysis. The absolute value of the index  
10 coefficient exceeding 0 in LASSO analysis and the  $p$ -value  $< 0.05$  in  
11 logistic regression analysis served as the screening criteria, ultimately 6  
12 molecules (HGB, UA, LDL-c, ALB, TIMP1, and LGALS3) were selected  
13 (Table S9). Furthermore, machine learning using ten standard two-  
14 categorical variable algorithms applied for modeling in the above training  
15 data set (Table S8) and prediction of stroke recovery in another new test  
16 dataset (LE:  $n=15$ ; OE:  $n =11$ , Table S10). In the new test dataset,  $t$ -test  
17 showed there was no difference in age between the LE (mean  $70.87 \pm$   
18  $2.808$ ) and OE (mean  $60.09 \pm 2.630$ ) groups (Table 3), similar to the  
19 inclusion data for the training set (Figure 7D). While most of 10 machine  
20 learning algorithms in training datasets achieved a prediction efficiency  
21 of 100%, the random forest algorithm model demonstrated the highest  
22 prediction efficiency in new test datasets, reaching 80% (Figure 7E). The  
23 best model of the random forest exhibited an AUC of prediction  
24 efficiency at 100% for trainset data and 80% for testset data (Figure 7F).

1 An important advantage of the random forest model is that it can rank the  
2 importance of predictive features, which has important implications for  
3 clinical management. Except for ALB without any contribution value in  
4 the model with random forest, the importance of 5 indicators (HGB,  
5 TIMP1, LGALS3, UA, LDL-c) related to inflammatory response were  
6 visualized in Figure 7G. This study confirmed that central immune  
7 regulation might be crucial in stroke rehabilitation outcomes.

#### 8 **4. Discussion**

9 We developed a machine learning-based model to predict functional  
10 rehabilitation of subacute ischemic stroke accurately. This  
11 interdisciplinary study, involving clinical and animal samples, provided  
12 robust evidence that a combined prediction model of incorporating serum  
13 biomarkers (TIMP1 and LGALS3) and clinical-based indices (HGB, UA,  
14 LDL-c), which primarily encompassed the pathophysiology of  
15 neuroinflammation, anemia, and antioxidation, might help to  
16 differentiation disease severity of recovery. Furthermore, a random forest  
17 of machine learning has demonstrated the combined model's sensitivity  
18 and reliability in predicting ADL outcomes of post-stroke patients.  
19 Further extensive research is required to elucidate the function and  
20 underlying mechanisms by which the unbalanced neuroinflammatory  
21 response contributes to elevated TIMP1 and LGALS3 during stroke  
22 recovery.

23 The improvement of activity disorder from bedridden to domestic must  
24 result from the cooperation of various somatic functions and shows

1 significant differences in biochemical indicators of nutritional status,  
2 neuroimmune, oxidative damage and repair, and innervation function,  
3 embodied in differences in protein function and levels. Although multiple  
4 traditional markers for the prediction of functional outcomes after  
5 ischemic stroke have been reported with reliable accuracy, there are few  
6 combined prediction models elaborated in the literature. In our study,  
7 after these multi-omics and multidimensional experiments explored and  
8 validated the practicable variables in serum, biological and clinical-based  
9 markers were first incorporated by a machine learning algorithm to  
10 accurately predict the outcome of subacute ischemic stroke rehabilitation,  
11 grouped subjects with the novel and convenient Longshi scale for  
12 monitoring disability stratification of ADL in post-stroke. The grouping  
13 of LE (recovery from bedridden to bedridden) and OE (recovery from  
14 bedridden to domestic) according to the assessment of ADL at admission  
15 and discharge by the Longshi scale was equivalently consistent with the  
16 grouping by BI. The Longshi scale may be an alternative grouping  
17 method for biological and clinical research analysis on optimizing  
18 biomarker performance.

19 Blood biomarkers have the potential to reflect underlying molecular  
20 and cellular processes, thereby facilitating the development of effective  
21 therapeutic strategies and improving rehabilitation outcomes. Functional  
22 rehabilitation after stroke events are highly dependent upon restitution,  
23 substitution, and compensation of neural network connectivity<sup>16</sup>; reliable  
24 predictors of stroke rehabilitation should play a crucial role in the process

1 of injury and repair of NVU. Dead and dying cells or substances released  
2 by ischemic penumbra stimulate the production of inflammatory  
3 responses, mainly in microglia. Alternative immune activation is  
4 associated with decreased inflammation, decreased neurological damage,  
5 and increased NVU repair. Though advanced blood omics have benefited  
6 from the discovery of many new inflammation-related molecules, it is  
7 difficult to trace the central pathological changes directly in humans.  
8 Therefore, validating biomarkers in animal and cell models thus emerges  
9 as a viable solution. Candidates screened and validated through different  
10 dimensions may provide more reliable predictive value, helping to guide  
11 the development of new interventions.

12 We performed LC–MS/MS-based proteomic analysis in stroke subjects  
13 and investigated how these phenotypes correlate with 3-month recovery  
14 from ischemic stroke measured with ADL assessment. In the study, we  
15 identified 194 DEPs in LE vs HC and 174 DEPs in OE vs HC. To lessen  
16 the possible candidates, we used the RNA sequence of the ischemic  
17 prefrontal cortex in mice with MCAO at day 3 and day 7, equivalent to  
18 the clinical subacute stage of stroke recovery, considering the possibility  
19 of false positives of differential proteins due to the limited of clinical  
20 sample size. As a result, we focused on the 27 overlaps between DEPs  
21 and DEGs. Protein interaction network and functional analysis pointed  
22 directly to 8 target molecules of TIMP1, LGALS3, VIM, TGFB1, MYH9,  
23 CSF1R, GSN, and PTPRC. The qPCR validation of MCAO mice and  
24 OGD/R heMEC/D3 cells showed an important increase of the *TIMP1*,

1 *TGFB1*, and *LGALS3* expression after ischemia reperfusion. The  
2 elevation of TIMP1 and LGALS3 were confirmed in an enlarged clinical  
3 serum sample, while the level of TGFB1 was not significantly different in  
4 the subjects of stroke and healthy control. TIMP1<sup>17, 18</sup> and LGALS3<sup>19, 20</sup>,  
5 as novel inflammation-related factors, have been proven to be positively  
6 correlated with the poor outcomes of stroke and atherosclerosis.  
7 Therefore, our study focused on exploring the value of TIMP1 and  
8 LGALS3 in predicting the prognosis of stroke rehabilitation. LGALS3  
9 and TIMP1, as novel inflammatory factors, may play an essential role in  
10 microglia-related inflammation regulation and promote NVU injury  
11 repair.

12 TIMP1, one of the tissue inhibitors of metalloproteinase (TIMP) family,  
13 inhibits matrix metalloproteinases (MMPs), a vital protein in maintaining  
14 the homeostasis of extracellular matrix structure and function. Recent  
15 studies have revealed that TIMP-1 possesses MMP-independent functions,  
16 acting as an emerging multifunctional cytokine through binding to cell  
17 surface receptors in developing central nervous system diseases and  
18 tumors<sup>21-23</sup>. The change of TIMP1 is consistent with the survey  
19 conclusion that higher TIMP1 levels were associated with increased risk  
20 of mortality and major disability after acute ischemic stroke in clinical<sup>17</sup>,  
21 and the gene expression of *Timp-1* was upregulated in infarction of the  
22 MCAO model<sup>24, 25</sup>. Our study demonstrated that the correlation between  
23 changes in TIMP1 within 3 months post-stroke and stroke recovery  
24 scores remained significant even after adjusting for baseline stroke



1 severity. The latest study on the neuroinflammatory regulatory effect of  
2 TIMP1 through receptor-mediated signaling on the protection of the  
3 blood-brain barrier, independent of MMP9<sup>23</sup>, may provide novel insights  
4 into the reparative mechanism of TIMP1 in stroke injury. In our study we  
5 verified that the change in serum TIMP1 level was consistent with the  
6 variation tendency in proteomics. ROC analysis showed the reliability  
7 and specificity of TIMP1 (AUC=0.904, 0.873) in distinguishing the  
8 stroke from the healthy and LE from OE groups separately. The result  
9 indicated TIMP1 could be a marker to differentiate different recovery  
10 effects.

11 Another vital biomarker, LGALS3 (Galectin-3), a beta-galactosidase  
12 binding protein involved in microglial activation, a novel inflammatory  
13 factor known for its role in intravascular inflammation, lipid endocytosis,  
14 macrophage activation, cellular activation, and proliferation<sup>26</sup>. Many  
15 studies have revealed that galectin-3 plays an important role as a  
16 diagnostic or prognostic biomarker for neurodegenerative disorders,  
17 certain types of heart disease, viral infection, autoimmune disease, and  
18 tumors<sup>27-29</sup>. Additionally, LGALS3 could serve as a novel marker for the  
19 prediction of stroke clinical prognosis, positively associated with poor  
20 functional outcome and an increased risk of mortality in stroke patients<sup>30</sup>,  
21 <sup>31</sup>. Our data on the ROC analysis of LGALS3 (AUC=0.794) in the  
22 differentiation of the stroke with poor and good prognosis were consistent  
23 with this result. In molecular mechanism research, increasing evidence  
24 supports that LGALS3 modulates microglial activation under

1 neurodegeneration conditions<sup>32</sup>. Except for the report that LGALS3  
2 inhibits progressive fibrosis by modulating inflammatory profibrotic  
3 cascades<sup>33</sup>, few studies have elucidated the molecular mechanism of  
4 LGALS3 in post-infarction. Moreover, we detected the co-localized  
5 expression of TIMP1 and Lgals3 with microglia marker protein Iba1 with  
6 immunofluorescence, respectively. The findings of our study demonstrate  
7 firstly that microglia expressed TIMP1 and Lgals3 significantly increased  
8 during post-ischemic repair. It may be interesting to study further the  
9 mechanism of TIMP1 and Lgals3 regulation of microglial activation in  
10 ischemic stroke recovery.

11 Some clinical test indicators are also significant predictors. The data  
12 obtained from our enrolled patients underwent ROC analysis and  
13 LASSO-filtered variables to identify valuable predictive indicators, which  
14 primarily encompassed the pathophysiology of neuroinflammation,  
15 anemia, and antioxidation during the subacute stage of stroke. HGB  
16 levels are the gold standard for anemia, commonly and associated with  
17 poor outcome function after a stroke<sup>34, 35</sup>. The World Health Organization  
18 defines *anemia* as a hemoglobin level of less than 130 g/L. The average  
19 HGB level of patients in the OE group was 136.32 g/L, whereas in the LE  
20 group, it was 119.73 g/L, indicating an anemic state which may  
21 contribute to a poor prognosis. Low LDL-c is associated with a reduced  
22 risk of cardiovascular events and outcomes<sup>36</sup>. Higher serum UA levels  
23 have been proved to be an independent predictor of poor outcomes<sup>37</sup>.  
24 Though it has been reported UA as an independent predictor in stroke

1 prognosis remains controversial, the role of UA in ischemic stroke  
2 pathophysiology is inseparable from oxidative damage<sup>37, 38</sup>. Age is linked  
3 to the long-term outcome of post-stroke rehabilitation, and the older with  
4 a stroke will probably result in worse outcomes<sup>39</sup>. Our study showed no  
5 important differences in age between enrolled patients with good or poor  
6 prognosis. Additionally, we observed a weak association between age and  
7 prognostic indicators ( $p < 0.3$ ). These provided evidence that the OE  
8 group with good prognosis attributed to intervention therapy regardless of  
9 age. Variables selected in in this study could effectively reflect the  
10 underlying pathological progression of stroke recovery, thereby ensuring  
11 the predictive model of stroke rehabilitation with high accuracy.

12 This study is subject to certain limitations. Firstly, using a relatively  
13 small clinical sample in proteomics analysis may result in fewer  
14 differential proteins and limit the scope of bioinformatics analysis. To  
15 address this limitation, we strictly adhered to specific inclusion criteria,  
16 including age range (50-80 years), gender (male), and duration of onset  
17 (1-2 months) to minimize objective individual differences. Additionally,  
18 transcriptome changes at different stages of mice with MCAO were  
19 performed to validate our findings. Furthermore, in the validation  
20 experiments using ELISA analysis, we expanded the sample size to  
21 include 18 cases in the healthy control group and 52 cases in the stroke  
22 group. Recruiting larger sample sizes for model construction could yield  
23 even better prediction results. Despite the potential controversy  
24 surrounding the small sample size used in this study, it is essential to

1 emphasize that our ultimate biomarkers have been confirmed credible and  
2 valuable through two conventional biomarker selection methods and  
3 machine learning techniques.

#### 4 **Conclusions**

5 In conclusion, we reported using machine learning to develop a novel  
6 combination prognostic model of inflammation-derived biomarkers  
7 (TIMP1, LGALS3) and clinical-based biomarkers (HGB, UA, LDL-c) in  
8 predicting the rehabilitation of ischemic stroke. Our work raises the  
9 exciting possibility that monitoring changes in inflammatory protein in  
10 ischemic stroke recovery could be used to gauge the severity of stroke  
11 and used in complementary to clinical prognostic variables to function  
12 outcome during stroke recovery.

#### 13 **Abbreviations**

14 IS, ischemic stroke; LE, little effective recovery; OE, obvious effective  
15 recovery; HC, healthy control; ADL, activities of daily living; TIMP1,  
16 Tissue inhibitor of metalloproteinase 1; LGALS3, Galectin-3; MMPs,  
17 Matrix metalloproteinases; HGB, hemoglobin; LDL-c, low-density  
18 lipoprotein cholesterol; UA, uric acid; ROC, receiver operating  
19 characteristic; AUC, area under curve; NVU, neurovascular unit; ROS,  
20 reactive oxygen species; NO, nitric oxide; TNF- $\alpha$ , tumor necrosis factor  
21  $\alpha$ ; MCAO, middle cerebral artery occlusion; LC-MS/MS, liquid  
22 chromatography-tandem mass spectrometry analysis; UHPLC, ultra high-  
23 performance liquid chromatography; PASEF, parallel accumulation serial  
24 fragmentation; FPR, false-positive rate; DEPs, differentially expressed

1 proteins; PCA, principal component analysis; DEGs, differentially  
2 expressed genes; GO, gene ontology; TGFB1, Transforming Growth  
3 Factor beta 1; PTPRC, Protein Tyrosine Phosphatase Receptor Type C;  
4 VIM, Vimentin; MYH9, Myosin Heavy Chain 9; CSF1R, Colony  
5 stimulating factor 1 receptor; GSN, Gelsolin; TTC, triphenyl tetrazolium  
6 chloride; OGD/R, oxygen-glucose deprivation/ reoxygenation; PVN,  
7 paraventricular nucleus of hypothalamus; ECM, extracellular matrix;  
8 BBB, blood-brain barrier; PASEF, parallel cumulative serial  
9 fragmentation; DEPs, differentially expressed proteins; DEGs,  
10 differentially expressed genes GO, Gene Ontology; ALB, Albmin; svm,  
11 Support Vector Machine; rf, Random Forest; nnet, Artificial Neural and  
12 Network; nb, naive bayesian classifier; kkn, K-Nearest Neighbor;  
13 glmnet, Logistic Regression; C5.0; SEM, standard error of the mean.

#### 14 **Acknowledgements and Funding Sources**

15 This study was supported by funds from the Natural Science Funding  
16 of China (No.82272598 and No.81901470 to Jiao Luo, No. 82205065 to  
17 Mingchao Zhou), the Science, Technology and Innovation Commission  
18 of Shenzhen (JCYJ20220530150407015 to Yulong Wang,  
19 JCYJ20230807115123047 to Mingchao Zhou, JCYJ20210324135804012  
20 to Jiao Luo), Natural Science Foundation of Guangdong Province, China  
21 (No. 2020A1515011203), the Postdoctoral Science Foundation of China  
22 (No. 2019M663100).

#### 23 **Conflicts of Interest**

24 There is no conflict of interest for all authors who share data and

1 materials in this article.

## 2 **Supplemental Materials**

3 Table S1-S10 and Figure S1-S2

## 4 **Author Contributions**

5 L.J. and C.Y. proposed the conception and design; L.J., C.Y. and  
6 Z.M.C. performed research; L.J., H.Y.Y, Z.L.Y., and M.Y.Q. contributed  
7 acquisition of clinical data; L.J., T.Q.Y., L.J.B., and G.J. contributed  
8 acquisition of animal and cell experimental data; L.J., X.P., C.C.Q.,  
9 H.M.L., and Z.X.H. contributed interpretation of clinical data; L.J. and  
10 C.Y. drafted the manuscript and revised it critically for important  
11 intellectual content; W.Y.L. supervised the experiments and revised and  
12 finalized the approval of the version to be published.

---

## 1 Reference

- 2 1. Wu S, Wu B, Liu M, Chen Z, Wang W, Anderson C, et al. Stroke in china:  
3 Advances and challenges in epidemiology, prevention, and management. 2019;18:394-405
- 4 2. Xiong Y, Wakhloo AK, Fisher M. Advances in acute ischemic stroke therapy.  
5 *Circulation research*. 2022;130:1230-1251
- 6 3. Plubell DL, Fenton AM, Rosario S, Bergstrom P, Wilmarth PA, Clark WM, et al.  
7 High-density lipoprotein carries markers that track with recovery from stroke. *Circulation*  
8 *research*. 2020;127:1274-1287
- 9 4. Yu F, Li X, Feng X, Wei M, Luo Y, Zhao T, et al. Phenylacetylglutamine, a novel  
10 biomarker in acute ischemic stroke. 2021;8:798765
- 11 5. Li X, Lin S, Chen X, Huang W, Li Q, Zhang H, et al. The prognostic value of  
12 serum cytokines in patients with acute ischemic stroke. 2019;10:544-556
- 13 6. Lee SW, Song DJ, Ryu HS, Kim YS, Kim TS, Joo SP. Systemic macrophage  
14 depletion attenuates infarct size in an experimental mouse model of stroke. *Journal of*  
15 *cerebrovascular and endovascular neurosurgery*. 2021;23:304-313
- 16 7. Lyu J, Jiang X, Leak RK, Shi Y, Hu X, Chen J. Microglial responses to brain  
17 injury and disease: Functional diversity and new opportunities. *Translational stroke research*.  
18 2021;12:474-495
- 19 8. Guo K, Luo J, Feng D, Wu L, Wang X, Xia L, et al. Single-cell rna sequencing  
20 with combined use of bulk rna sequencing to reveal cell heterogeneity and molecular changes  
21 at acute stage of ischemic stroke in mouse cortex penumbra area. *Frontiers in cell and*  
22 *developmental biology*. 2021;9:624711
- 23 9. Zheng K, Lin L, Jiang W, Chen L, Zhang X, Zhang Q, et al. Single-cell rna-seq  
24 reveals the transcriptional landscape in ischemic stroke. *Journal of cerebral blood flow and*  
25 *metabolism : official journal of the International Society of Cerebral Blood Flow and*  
26 *Metabolism*. 2022;42:56-73
- 27 10. Gao Y, Wang Y, Li D, Zhao J, Dong Z, Zhou J, et al. Disability assessment in  
28 stroke: Relationship among the pictorial-based longshi scale, the barthel index, and the  
29 modified rankin scale. *Clinical rehabilitation*. 2021;35:606-613
- 30 11. Wu M, Chen Y, Xia H, Wang C, Tan CY, Cai X, et al. Transcriptional and  
31 proteomic insights into the host response in fatal covid-19 cases. *Proceedings of the National*  
32 *Academy of Sciences of the United States of America*. 2020;117:28336-28343
- 33 12. Cai Y, Zhang Y, Ke X, Guo Y, Yao C, Tang N, et al. Transcriptome sequencing  
34 unravels potential biomarkers at different stages of cerebral ischemic stroke. *Frontiers in*  
35 *genetics*. 2019;10:814

- 
- 1           13.    Ansari S, Azari H, McConnell DJ, Afzal A, Mocco J. Intraluminal middle cerebral  
2           artery occlusion (mcao) model for ischemic stroke with laser doppler flowmetry guidance in  
3           mice. *Journal of visualized experiments : JoVE*. 2011
- 4           14.    Longa EZ, Weinstein PR, Carlson S, Cummins R. Reversible middle cerebral  
5           artery occlusion without craniectomy in rats. *Stroke*. 1989;20:84-91
- 6           15.    Gunsilius E, Petzer AL, Stockhammer G, Kähler CM, Gastl G. Serial measurement  
7           of vascular endothelial growth factor and transforming growth factor-beta1 in serum of  
8           patients with acute ischemic stroke. *Stroke*. 2001;32:275-278
- 9           16.    Minnerup J, Strecker JK, Wachsmuth L, Hoppen M, Schmidt A, Hermann DM, et  
10          al. Defining mechanisms of neural plasticity after brainstem ischemia in rats. *Annals of*  
11          *neurology*. 2018;83:1003-1015
- 12          17.    Zhong C, Wang G, Xu T, Zhu Z, Guo D, Zheng X, et al. Tissue inhibitor  
13          metalloproteinase-1 and clinical outcomes after acute ischemic stroke. 2019;93:e1675-e1685
- 14          18.    Zureik M, Beaudeau JL, Courbon D, Bénétos A, Ducimetière P. Serum tissue  
15          inhibitors of metalloproteinases 1 (timp-1) and carotid atherosclerosis and aortic arterial  
16          stiffness. *Journal of hypertension*. 2005;23:2263-2268
- 17          19.    Wang A, Zhong C, Zhu Z, Xu T, Peng Y, Xu T, et al. Serum galectin-3 and poor  
18          outcomes among patients with acute ischemic stroke. *Stroke*. 2018;49:211-214
- 19          20.    Sherpa MD, Sonkawade SD, Jonnala V, Pokharel S, Khazaeli M, Yatsynovich Y,  
20          et al. Galectin-3 is associated with cardiac fibrosis and an increased risk of sudden death.  
21          *Cells*. 2023;12
- 22          21.    Justo BL, Jasiulionis MG. Characteristics of timp1, cd63, and  $\beta$ 1-integrin and the  
23          functional impact of their interaction in cancer. *International journal of molecular sciences*.  
24          2021;22
- 25          22.    Grünwald B, Schoeps B, Krüger A. Recognizing the molecular multifunctionality  
26          and interactome of timp-1. *Trends in cell biology*. 2019;29:6-19
- 27          23.    Tang J, Kang Y, Huang L, Wu L, Peng Y. Timp1 preserves the blood-brain barrier  
28          through interacting with cd63/integrin  $\beta$  1 complex and regulating downstream fak/rhoa  
29          signaling. *Acta pharmaceutica Sinica. B*. 2020;10:987-1003
- 30          24.    Hirono J, Sanaki H, Kitada K, Sada H, Suzuki A, Lie L, et al. Expression of tissue  
31          inhibitor of metalloproteinases and matrix metalloproteinases in the ischemic brain of  
32          photothrombosis model mice. 2018;29:174-180
- 33          25.    Wang X, Barone F, White R, Feuerstein GJS. Subtractive cloning identifies tissue  
34          inhibitor of matrix metalloproteinase-1 (timp-1) increased gene expression following focal  
35          stroke. 1998;29:516-520
- 36          26.    Gao Z, Liu Z, Wang R, Zheng Y, Li H, Yang L. Galectin-3 is a potential mediator



- 
- 1 for atherosclerosis. *Journal of immunology research*. 2020;2020:5284728
- 2 27. Hara A, Niwa M, Noguchi K, Kanayama T, Niwa A, Matsuo M, et al. Galectin-3
- 3 as a next-generation biomarker for detecting early stage of various diseases. *Biomolecules*.
- 4 2020;10
- 5 28. Niang DGM, Gaba FM, Diouf A, Hendricks J, Diallo RN, Niang MDS, et al.
- 6 Galectin-3 as a biomarker in breast neoplasms: Mechanisms and applications in patient care.
- 7 *Journal of leukocyte biology*. 2022;112:1041-1052
- 8 29. Boza-Serrano A, Vrillon A, Minta K, Paulus A, Camprubi-Ferrer L, Garcia M, et
- 9 al. Galectin-3 is elevated in csf and is associated with a $\beta$  deposits and tau aggregates in brain
- 10 tissue in alzheimer's disease. *Acta neuropathologica*. 2022;144:843-859
- 11 30. Han X, Geng B, Deng F, Ma Y, Fan N, Huang S, et al. Galectin-3 is associated
- 12 with the functional outcome and mortality in stroke patients: A systematic review and meta-
- 13 analysis. *Heliyon*. 2023;9:e13279
- 14 31. Sayed A, Munir M, Nabet MS, Alghamdi BS, Ashraf GM, Bahbah EI, et al.
- 15 Galectin-3: A novel marker for the prediction of stroke incidence and clinical prognosis.
- 16 *Mediators of inflammation*. 2022;2022:2924773
- 17 32. García-Revilla J, Boza-Serrano A, Espinosa-Oliva AM, Soto MS, Deierborg T,
- 18 Ruiz R, et al. Galectin-3, a rising star in modulating microglia activation under conditions of
- 19 neurodegeneration. *Cell death & disease*. 2022;13:628
- 20 33. Wang X, Gaur M, Mounzih K, Rodriguez HJ, Qiu H, Chen M, et al. Inhibition of
- 21 galectin-3 post-infarction impedes progressive fibrosis by regulating inflammatory profibrotic
- 22 cascades. *Cardiovascular research*. 2023;119:2536-2549
- 23 34. Zhang R, Xu Q, Wang A, Jiang Y, Meng X, Zhou M, et al. Hemoglobin
- 24 concentration and clinical outcomes after acute ischemic stroke or transient ischemic attack.
- 25 *Journal of the American Heart Association*. 2021;10:e022547
- 26 35. Doehner W, Scherbakov N, Schellenberg T, Jankowska EA, Scheitz JF, von
- 27 Haehling S, et al. Iron deficiency is related to low functional outcome in patients at early
- 28 rehabilitation after acute stroke. *Journal of cachexia, sarcopenia and muscle*. 2022;13:1036-
- 29 1044
- 30 36. Gaba P, O'Donoghue ML, Park JG, Wiviott SD, Atar D, Kuder JF, et al.
- 31 Association between achieved low-density lipoprotein cholesterol levels and long-term
- 32 cardiovascular and safety outcomes: An analysis of fourier-ole. *Circulation*. 2023;147:1192-
- 33 1203
- 34 37. Weir CJ, Muir SW, Walters MR, Lees KR. Serum urate as an independent
- 35 predictor of poor outcome and future vascular events after acute stroke. *Stroke*. 2003;34:1951-
- 36 1956

- 1                    38. Chamorro A, Obach V, Cervera A, Revilla M, Deulofeu R, Aponte JH. Prognostic  
2                    significance of uric acid serum concentration in patients with acute ischemic stroke. *Stroke*.  
3                    2002;33:1048-1052  
4                    39. Abgottspon S, Thaqi Q, Steiner L, Slavova N, Grunt S, Steinlin M, et al. Effect of  
5                    age at pediatric stroke on long-term cognitive outcome. *Neurology*. 2022;98:e721-e729

## 7 **Tables**

8                    **Table 1. ADL assessment of enrolled subjects for LC-MS/MS**

| Characteristic                                                    | Health Controls<br>(HC) | Ischemic Stroke (IS)                |                                      |
|-------------------------------------------------------------------|-------------------------|-------------------------------------|--------------------------------------|
|                                                                   |                         | Obvious effects (OE)                | Little effects (LE)                  |
| Gender (male)                                                     | 6                       | 5                                   | 5                                    |
| Age (year)                                                        | 56.50 ± 2.655           | 67.40 ± 4.445                       | 67.20 ± 2.478                        |
| Diagnosis                                                         | Normal                  | Ischemic stroke                     | Ischemic stroke                      |
| ADL assessment of Barthel<br>Index at admission<br>(at discharge) | NA                      | 34.00 ± 3.674<br>(42.00 ± 5.831)    | 21.00 ± 2.739<br>(22.00 ± 2.550)     |
| ADL assessment of<br>Longshi Scale at admission<br>(at discharge) | NA                      | Bedridden group<br>(Domestic group) | Bedridden group<br>(Bedridden group) |

9

10                    **Table 2. ADL assessment of enrolled subjects for ELISA validation**

| Characteristic | Health Controls<br>(HC) | Ischemic Stroke (IS) |                     |
|----------------|-------------------------|----------------------|---------------------|
|                |                         | Obvious effects (OE) | Little effects (LE) |
| Gender (male)  | 18                      | 11                   | 15                  |
| Age (year)     | 67.00 ± 2.099           | 63.27 ± 2.711        | 69.80 ± 2.322       |
| Diagnosis      | Normal                  | Ischemic stroke      | Ischemic stroke     |

|                                                             |    |                                     |                                      |
|-------------------------------------------------------------|----|-------------------------------------|--------------------------------------|
| ADL assessment of Barthel Index at admission (at discharge) | NA | 30.91 ± 3.149<br>(55.45 ± 6.923) ** | 23.67 ± 4.125<br>(25.67 ± 4.165)     |
| ADL assessment of Longshi Scale at admission (at discharge) | NA | Bedridden group<br>(Domestic group) | Bedridden group<br>(Bedridden group) |

1      "\*\*\*" represents statistical significance at  $p < 0.01$

2                      **Table 3. ADL assessment of enrolled patients for test dataset**

3                                              **with machine learning**

| Characteristic                                              | Ischemic Stroke (IS)                   |                                      |
|-------------------------------------------------------------|----------------------------------------|--------------------------------------|
|                                                             | Obvious effects (OE)                   | Little effects (LE)                  |
| Gender (male)                                               | 11                                     | 15                                   |
| Age (year)                                                  | 60.09 ± 2.630                          | 70.87 ± 2.808                        |
| Diagnosis                                                   | Ischemic stroke                        | Ischemic stroke                      |
| ADL assessment of Barthel Index at admission (at discharge) | 32.73 ± 4.737<br>(57.27.45 ± 4.879) ** | 22.33 ± 3.268<br>(23.00 ± 3.229)     |
| ADL assessment of Longshi Scale at admission (at discharge) | Bedridden group<br>(Domestic group)    | Bedridden group<br>(Bedridden group) |

4      "\*\*\*" represents statistical significance at  $p < 0.01$

5

## 1 Figures and Figure Legend

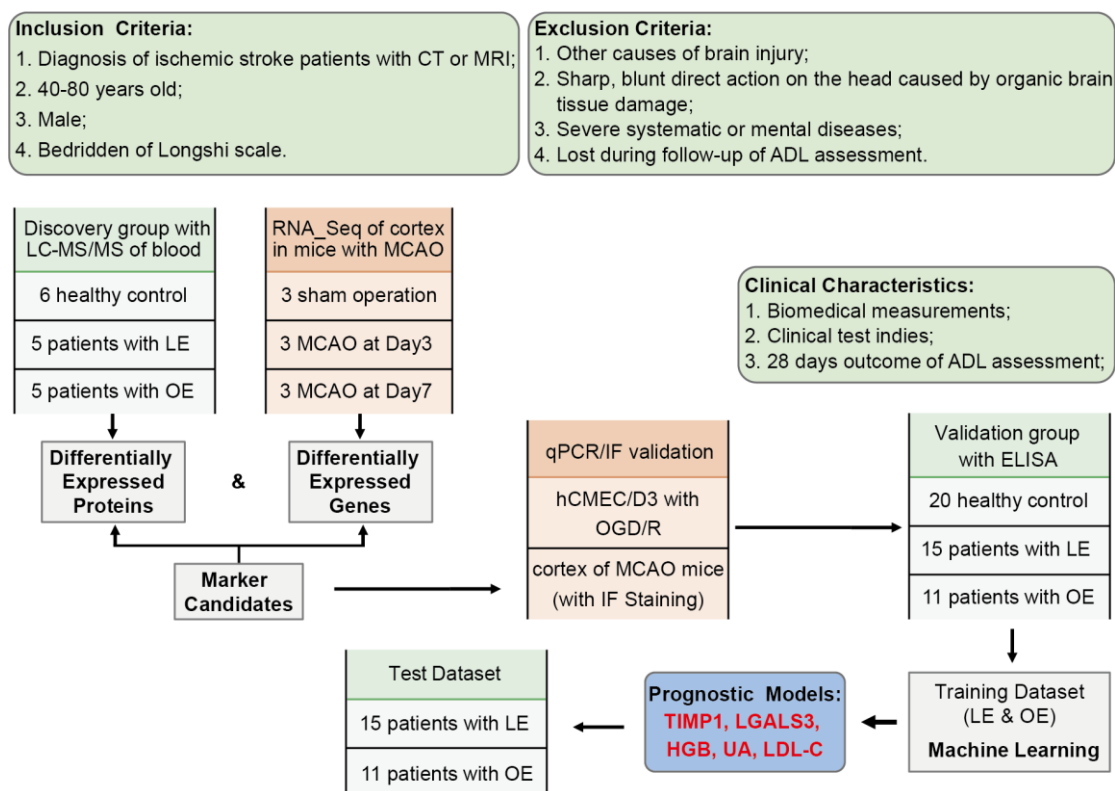

2

3 **Fig1. Overall experimental design for a combined model development based**  
 4 **on machine learning.**

5 Ischemic stroke patients were categorized into LE and OE group based on activities  
 6 of daily living assessments followed by a 28-day recovery. Discovery group  
 7 underwent proteomic testing for initial candidates. Multidimensional validation of  
 8 ischemia-reperfusion at protein and mRNA levels was performed both in vivo and in  
 9 vitro. ROC and LASSO analysis in an additional cohort to confirm the candidate  
 10 biomarker and clinical variables in the discriminatory sensitivity and specificity  
 11 between the LE and OE groups. Candidates were modeled using ten standard machine  
 12 learning algorithms and then prediction outcomes in another new dataset.

13 **Abbreviations:** CT, Computed Tomography; MRI, magnetic resonance imaging,  
 14 LC-MS/MS, liquid chromatography-tandem mass spectrometry analysis; LE, little

1 effective recovery; OE, obvious effective recovery; HC, Healthy Control; MCAO,  
 2 middle cerebral artery occlusion; OGD/R, oxygen-glucose deprivation/ reoxygenation;  
 3 HGB, hemoglobin; LDL-c, low-density lipoprotein cholesterol; UA, uric acid; ADL,  
 4 activities of daily living.  
 5

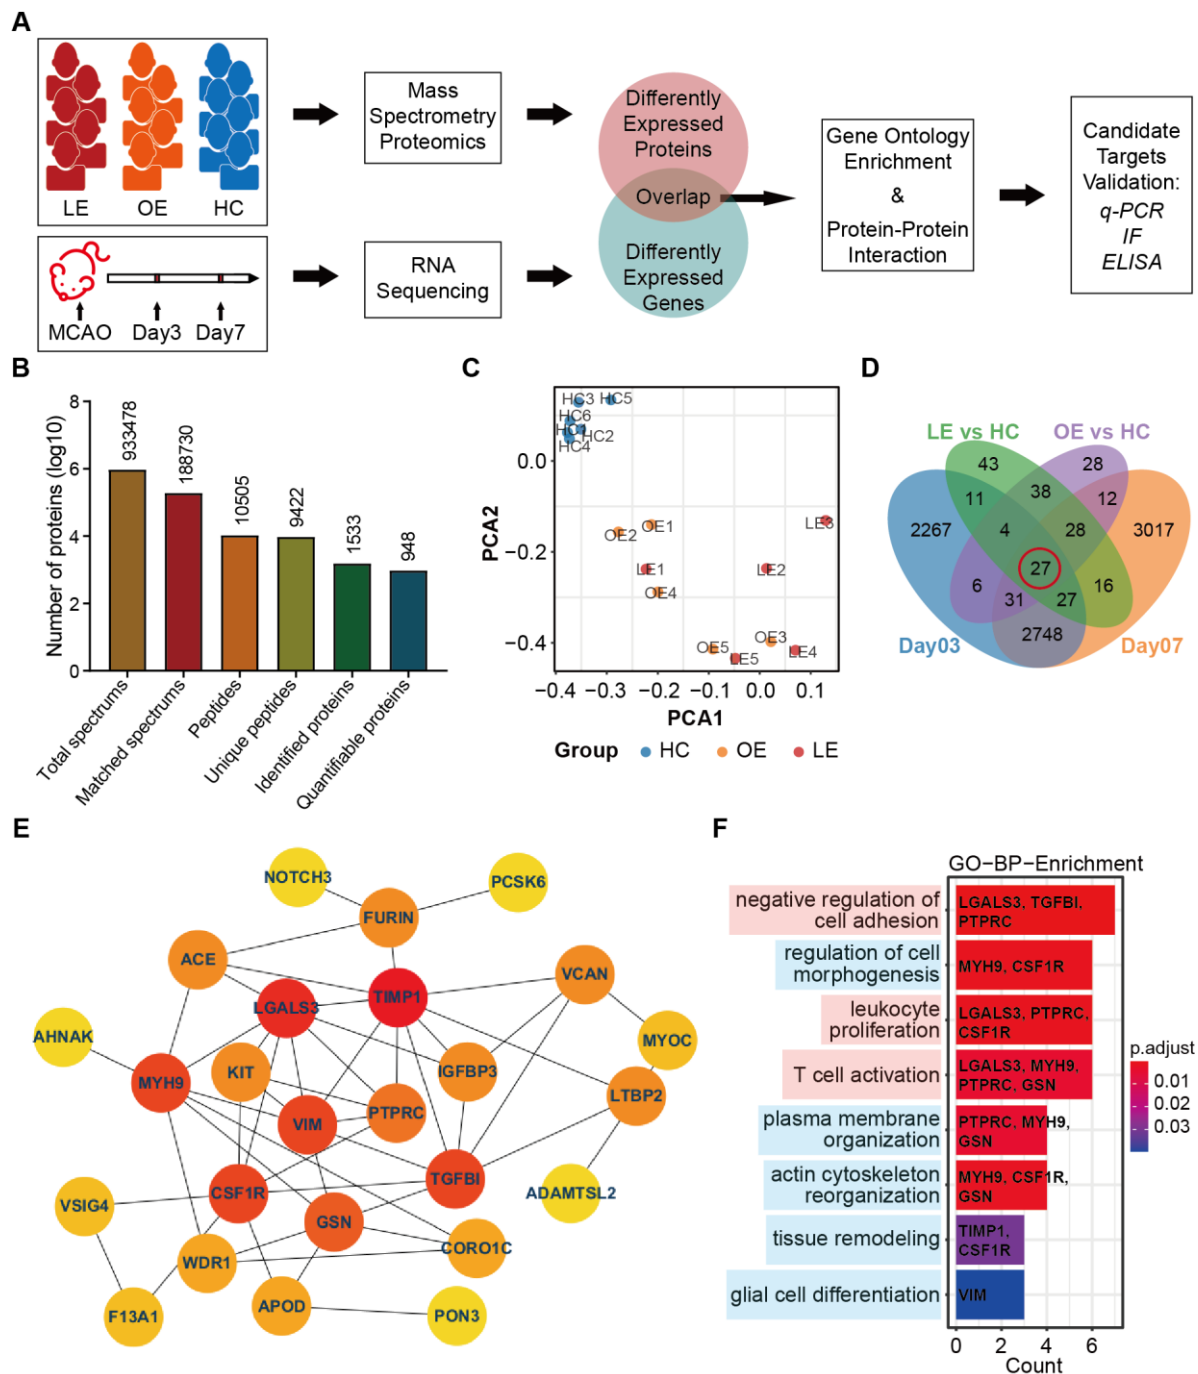

6

7

**Fig2. Screening robust target molecules from different omics data of humans**

1 **and mice after ischemic injury.**

2 **A**, Workflow chart of the study. Human serum samples for LC-MS/MS were  
3 categorized into three groups based on ADL assessment using the Longshi scale: LE  
4 group, representing patients with poor prognosis transitioning from bedridden to  
5 bedridden; OE group, representing patients with good prognosis transitioning from  
6 bedridden to domestic assessed by Longshi Scale; and healthy controls. Mouse brain  
7 samples for RNA sequencing were collected from the operative side of the brain on  
8 days 3 and 7 after MCAO, while the contralateral side of the brain served as a control.  
9 The differentially expressed proteins (DEPs) obtained through protein profiling and  
10 differentially expressed genes (DEGs) obtained through RNA sequencing were  
11 overlapped. GO functional analysis and protein network interaction analysis were  
12 performed on the intersecting genes. Candidate targets were validated with qPCR,  
13 WB and ELISA analyses at both the RNA and protein levels. **B**, Protein information  
14 detected by mass spectrometry proteomics in the LE (n=5), OE (n=5), and HC (n=5)  
15 groups. **C**, PCA plots revealed the separation of samples in LC-MS/MS. **D**, Venn  
16 diagram of differentially expressed proteins obtained by protein profiling and the  
17 differentially expressed genes obtained by RNA sequencing, 27 molecules were  
18 differentially expressed in all 4 groups. **E**, The protein-protein interaction network  
19 diagram displayed by cytoscape. Different colors represent the order of protein  
20 importance, the redder the color, the more important it is. **F**, The 27 proteins in the  
21 intersection set in D were subjected to GO functional enrichment, and the de-  
22 dundant items terms directly related to the 8 most important proteins in E were filtered  
23 from the significantly Biological Processes terms. Shown are the top 8 terms with  
24 “p.adjust” ranking. The background colors of the labels were artificially divided into

1 two groups according to function, with the pink group being related to immunity and  
 2 the blue group being related to histomorphology.

3 **Abbreviations:** PCA, Principal Component Analysis; TGFB1, Transforming  
 4 Growth Factor beta 1; PTPRC, Protein Tyrosine Phosphatase Receptor Type C; VIM,  
 5 Vimentin; MYH9, Myosin Heavy Chain 9; CSF1R, Colony stimulating factor 1  
 6 receptor; GSN, Gelsolin; GO, Gene Ontology; BP, Biological Processes.

7

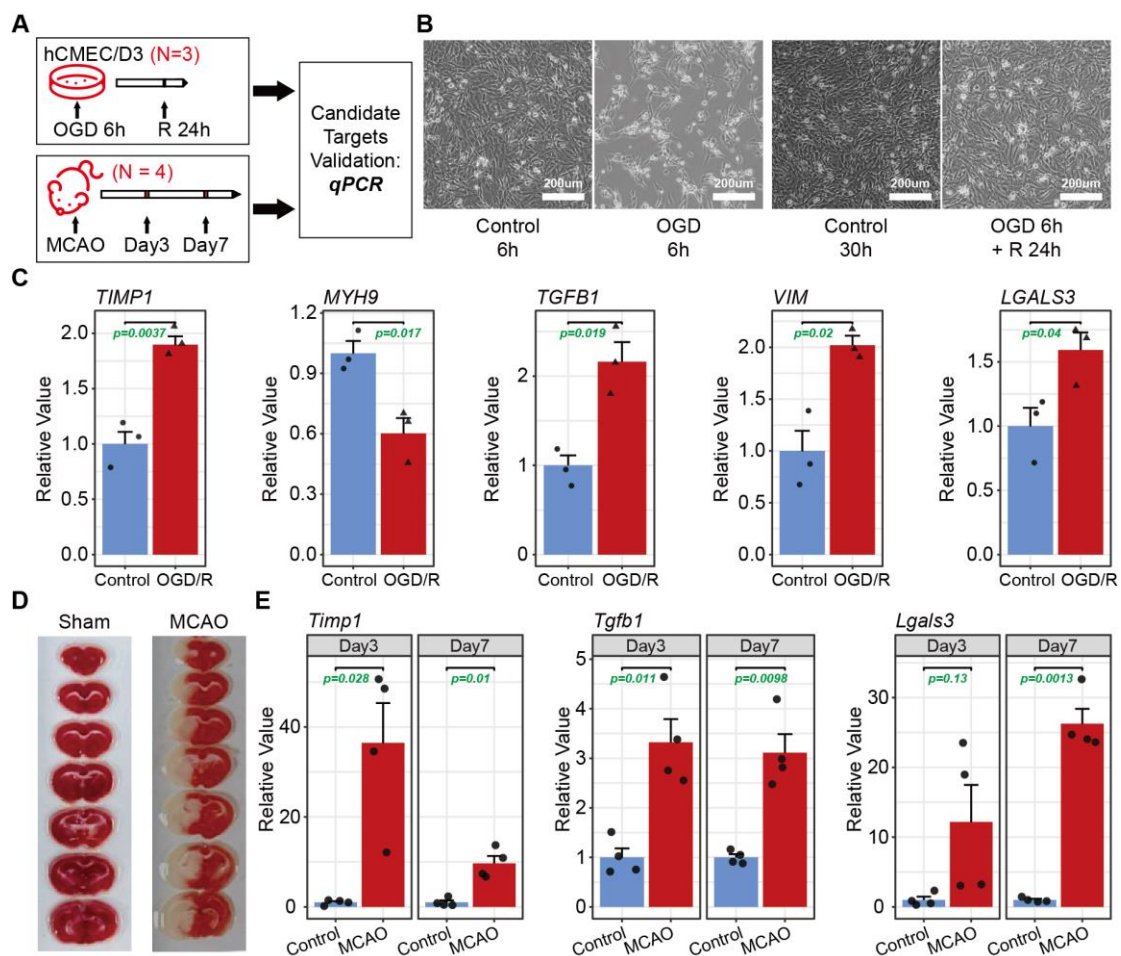

8

9 **Fig3. Validation of the candidate targets at the RNA levels in vitro and in vivo.**

10 **A**, Work flow chart of study. The hCMEC/D3 cells are human brain microvascular  
 11 endothelial cell line that were OGD-treated for 6 hr, reoxygenation for 24 hr, and then  
 12 the samples were collected in 3 biological replicates per group. The model of mice



1 with MCAO was followed by taking brain tissue on days 3 and 7, 4 biological  
2 replicates per group. **B**, Bright field images of the hCMEC/D3 cells during OGD/R  
3 modeling indicating successful modeling. **C**, Histograms of the q-PCR expression  
4 levels of the 8 target molecules in hCMEC/D3 cells with OGD/R. The histogram  
5 displays the qPCR expression levels of the 8 target molecules in hCMEC/D3 cells.  
6 The statistically significant molecules, with differences determined by *p*-value from  
7 smallest to largest, were arranged from left to right. Supplementary Figure S1A  
8 showed the molecules without significant differences. Each data point represents a  
9 biological sample. **D**, TTC staining images of successful MCAO modeling. **E**,  
10 Histograms of the qPCR expression levels of the 8 target molecules of the brain tissue  
11 in mice with MCAO. 3 molecules with significant difference presented as in C and  
12 Other molecules were shown in Supplementary Fig. 1 B. Each point represents a  
13 biological sample.



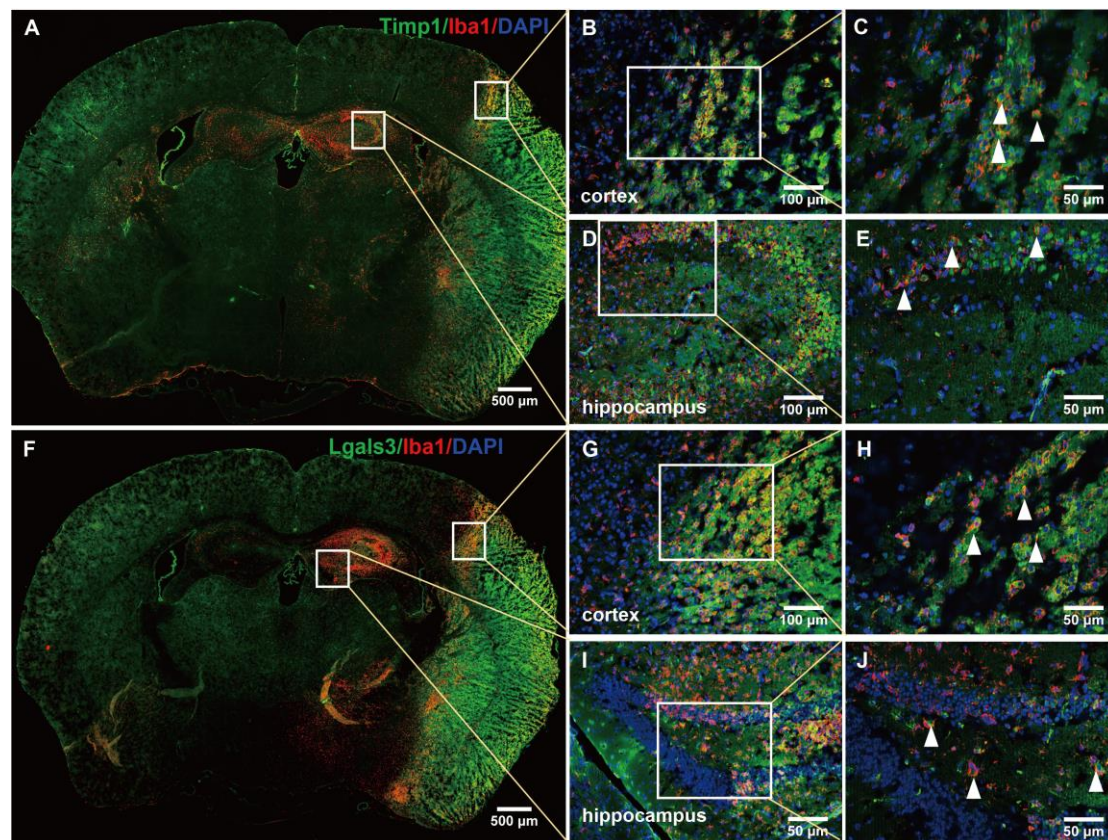

1

2 **Fig4. IF staining of candidates in brain sections of mice with MCAO.**

3 **A**, Immunofluorescence staining with anti-Timp1 (green) and anti-Iba1 in brain  
4 sections of mice with MCAO on day 7; **B-C**, Staining magnification of the ischemic  
5 penumbra cortex; **D-E**, Staining magnification of the ischemic hippocampus; **F**,  
6 Immunofluorescence staining with anti-Lgals3 (green) and anti-Iba1 in brain sections  
7 of mice with MCAO on day 7; **G-H**, Staining magnification of the ischemic  
8 penumbra cortex; **I-J**, Staining magnification of the ischemic hippocampus. Nucleus  
9 were dyed with DAPI staining (blue). The white triangle referred to the colocalization  
10 expression of targets and Iba1.

11

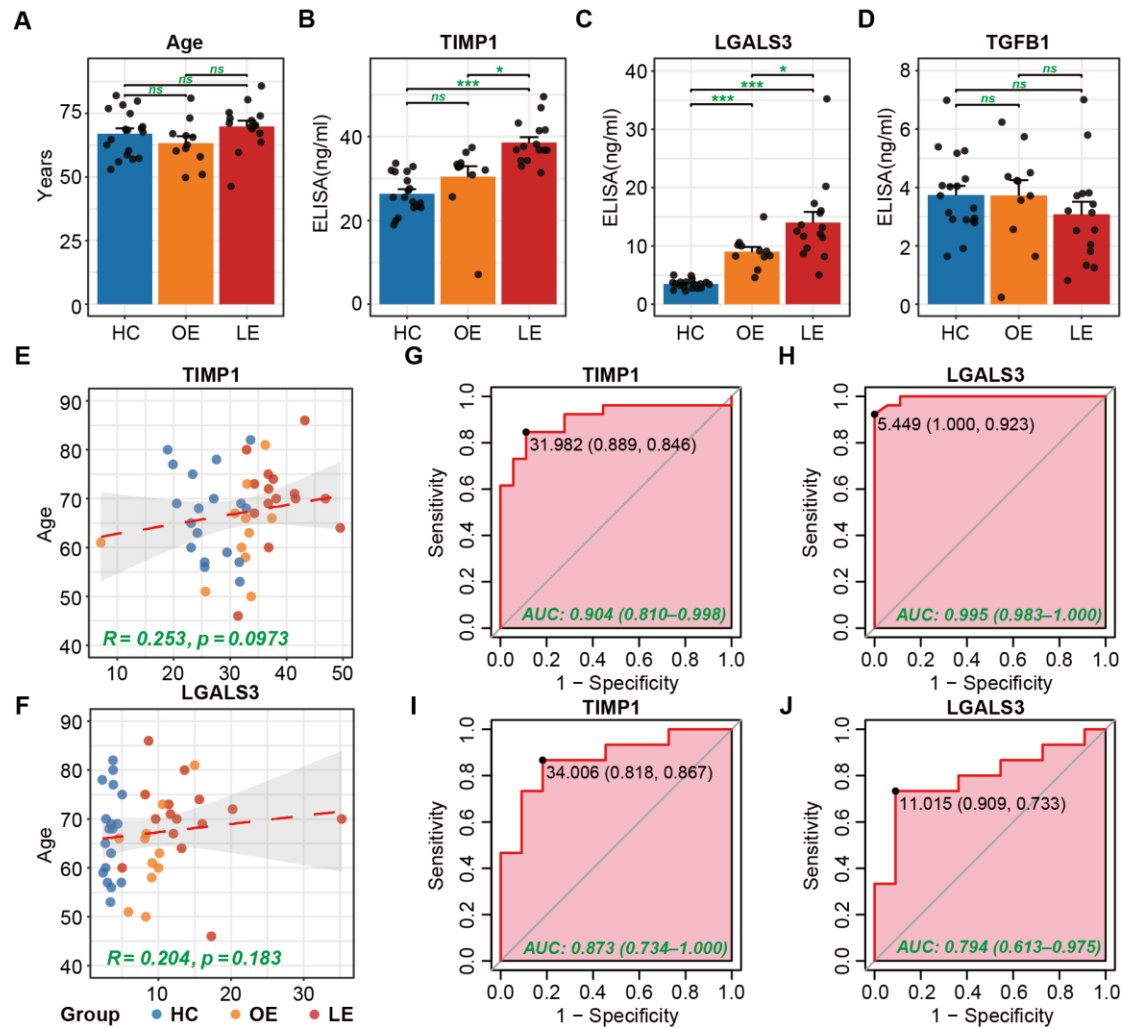

1

2 **Fig5. Validation and ROC analysis of target molecules at the protein level in**  
 3 **ischemic stroke patients.**

4 **A**, Age distribution statistics of recruited clinical subjects of the LE (n=15), OE  
 5 (n=11), and HC (n=20). Each point represents an individual. **B-D**, Histograms of the  
 6 ELISA expression levels of the 3 target molecules validated at RNA level. The data  
 7 were analyzed using one-way ANOVA analysis. “\*” represents  $p < 0.05$ , “\*\*\*”  
 8 represents  $p < 0.01$ , “\*\*\*\*” represents  $p < 0.001$ . Each point represents an individual.  
 9 **E-F**, Correlation scatter plots of TIMP1 and LGALS3 with age. The red dashed lines  
 10 are the trend lines, with the Pearson’s correlation coefficient (R) and p value of the  
 11 trend lines shown in green. Each point represents a biological sample. **G-I**, Receiver

1 Operating Characteristic (ROC) analysis of TIMP1 for the discrimination of  
2 Stroke/Control individuals and LE/OE individuals, respectively, with the Area Under  
3 the ROC Curve (AUC) shown in green. The black dots represent points on the ROC  
4 curve to gain optimal discriminative measures. **H-J**, ROC analysis of LGALS3 for the  
5 discrimination of Stroke/Control individuals and LE/OE individuals, respectively. The  
6 black dots represent points on the ROC curve to gain optimal discriminative measures.  
7

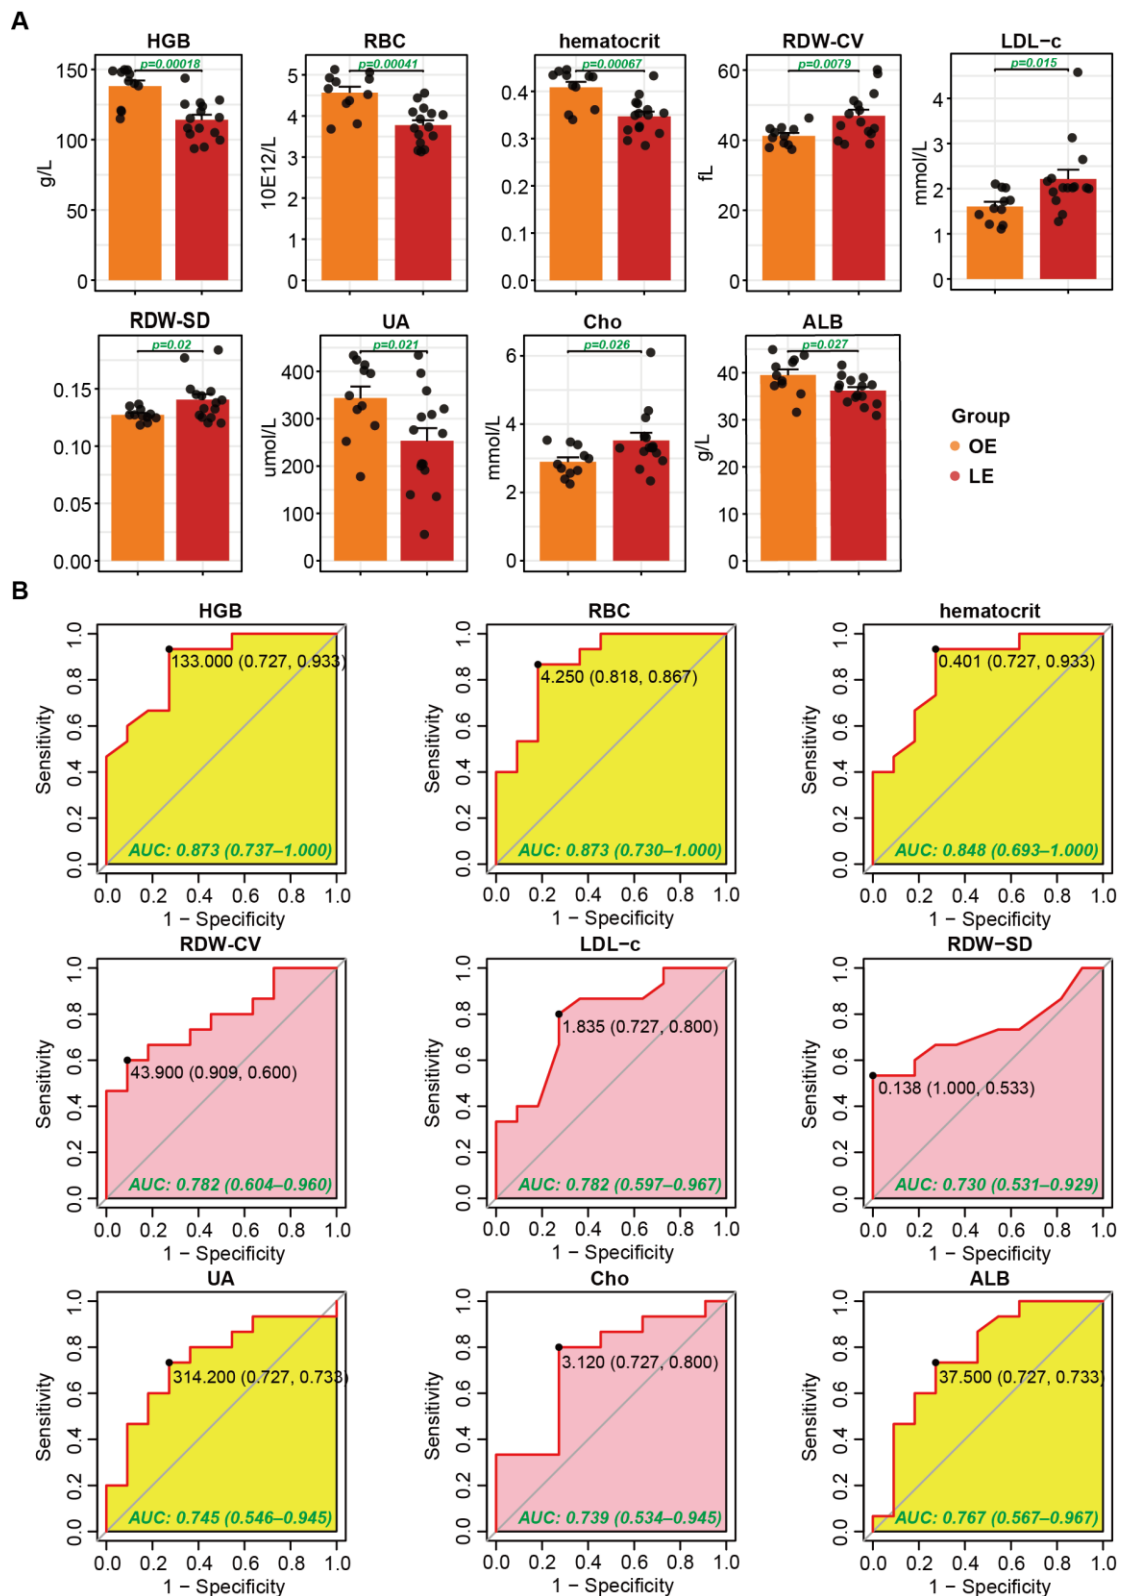

1  
2 **Fig6. Analysis of clinical indicators of recruited clinical subjects with ischemic**  
3 **stroke.**

4 **A, Histograms of the clinical indicator expression levels in the LE (n=15) and OE**

1 (n=11). The showed are the statistically significant indicators those with significant  
2 differences according to *p*-value from smallest to largest from left to right, and from  
3 up to down, and those without significant differences are shown in Supplementary  
4 Figure 2 C. Each point represents a biological sample. **B**, Receiver Operating  
5 Characteristic (ROC) analysis of indicators in A for the discrimination of LE/OE  
6 individuals, respectively, with the Area Under the ROC Curve (AUC) shown in green.  
7 The black dots represent points on the ROC curve to gain optimal discriminative  
8 measures. The yellow background represents a positive correlation with good  
9 prognosis, and the red background represents a negative correlation.

10 **Abbreviations:** HGB, hemoglobin, RBC, erythrocyte count; RDW-CV, SD of  
11 erythrocyte volume; LDL-c, low-density lipoprotein cholesterol; RDW-SD, blood red  
12 cell volume distribution width; UA, uric acid; Cho, total cholesterol; ALB, albumin.

13

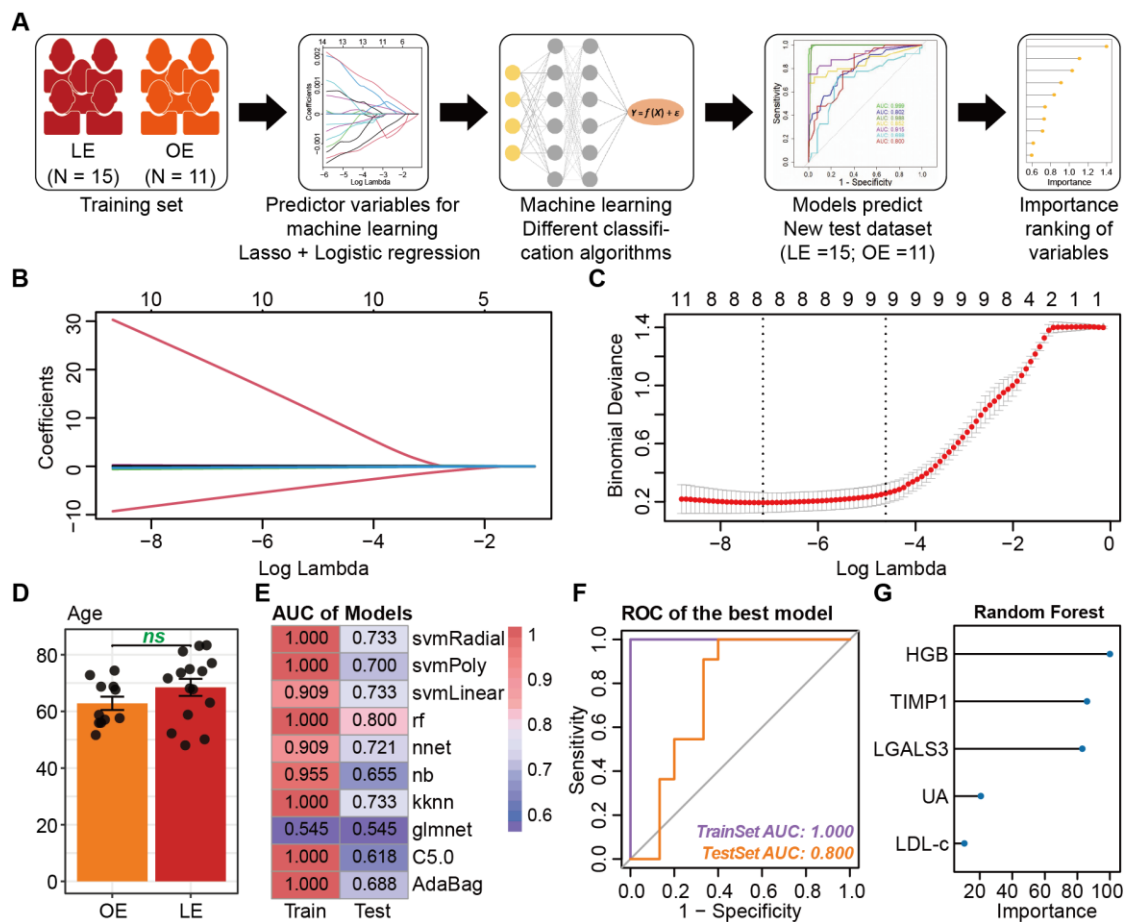

1

2 **Fig7. Screen biomolecules and clinical-based indicators to predict prognosis**  
 3 **using machine learning modeling.**

4 **A**, Work flow chart of prognosis biomarker discovery with machine learning. **B**,  
 5 Coefficients and lambda correlation plot of LASSO filtered variables. **C**, Lambda  
 6 value plot of LASSO analysis. **D**, Age distribution statistics of clinical subjects  
 7 recruited to the test dataset. Each point represents an individual. **E**, A total of 10  
 8 prediction models with 10 different machine learning classification algorithms for  
 9 distinguishing dichotomous variables and the calculated discriminatory AUCs of each  
 10 model across the training datasets (Train) and the blinded testing datasets (Test).  
 11 Machine learning algorithms including Support Vector Machine (svmRatial, svmPloy,  
 12 and svmLinear), Artificial Neural and Network (nnet), Logistic Regression (glmnet),



1 Naive Bayesian Classifier (nb), K-Nearest Neighbor (kkn), Decision Tree Algorithm  
2 (C5.0, AdaBag, and Random Forest). **F**, ROC plots of the best-performing model in  
3 panel E, and the prognosis accuracy on the corresponding datasets were shown in the  
4 lower right corner. **G**, The top 5 feature molecules in the best predictive model  
5 (“random forest” on title) in panel F based on the variable importance ranking.  
6

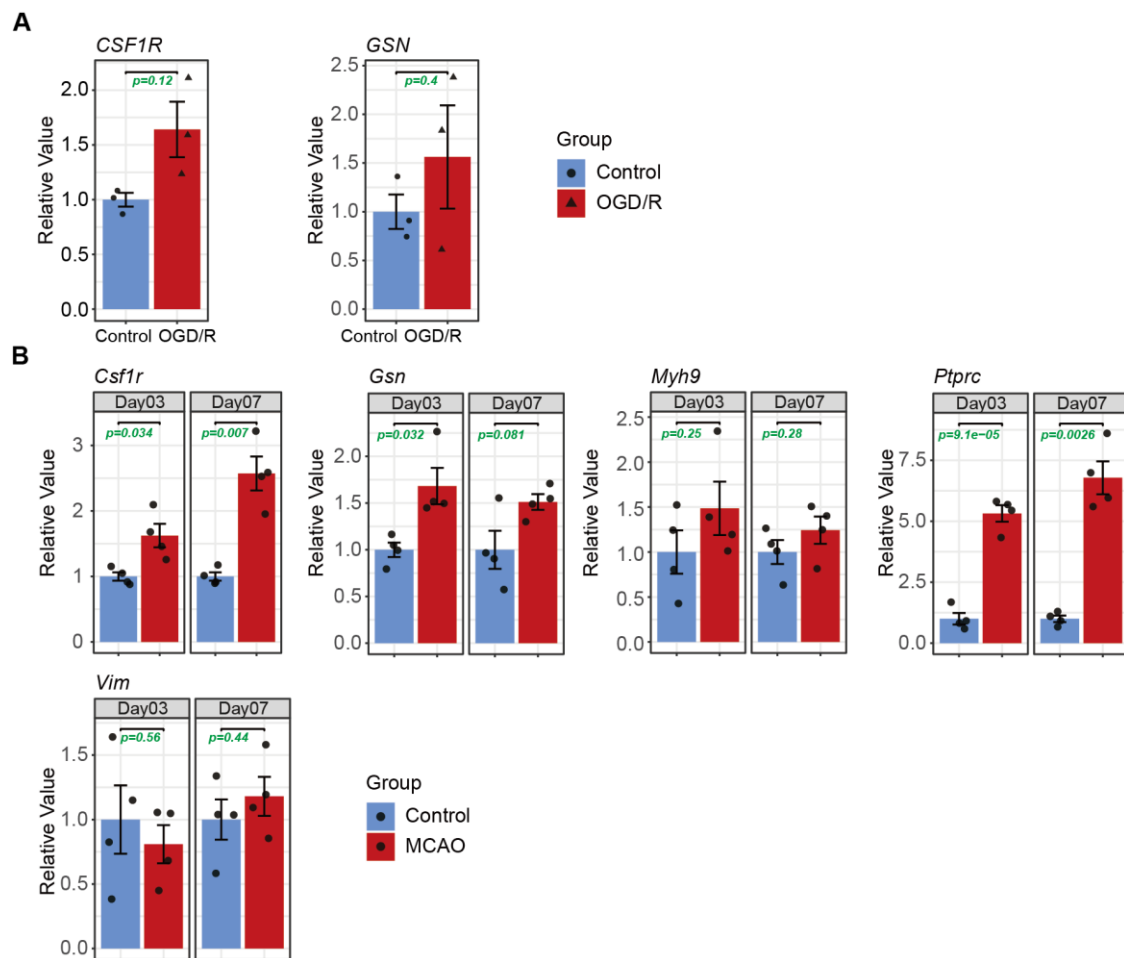

7

8 **FigS1. Supplementary figure corresponding to Figure 2.**

9 **A**, The histogram displays the qPCR expression levels of *CSF1R* and *GSN* mRNA  
10 in hcMEC/D3 cells after OGD/R. **B**, The histogram displays the qPCR expression  
11 levels of *Csf1r*, *Gsn*, *Myh9*, *Ptprc*, and *Vim* mRNA in ischemic cortex of mice with  
12 MCAO at day3 and day 7. Each data point represents a biological sample.

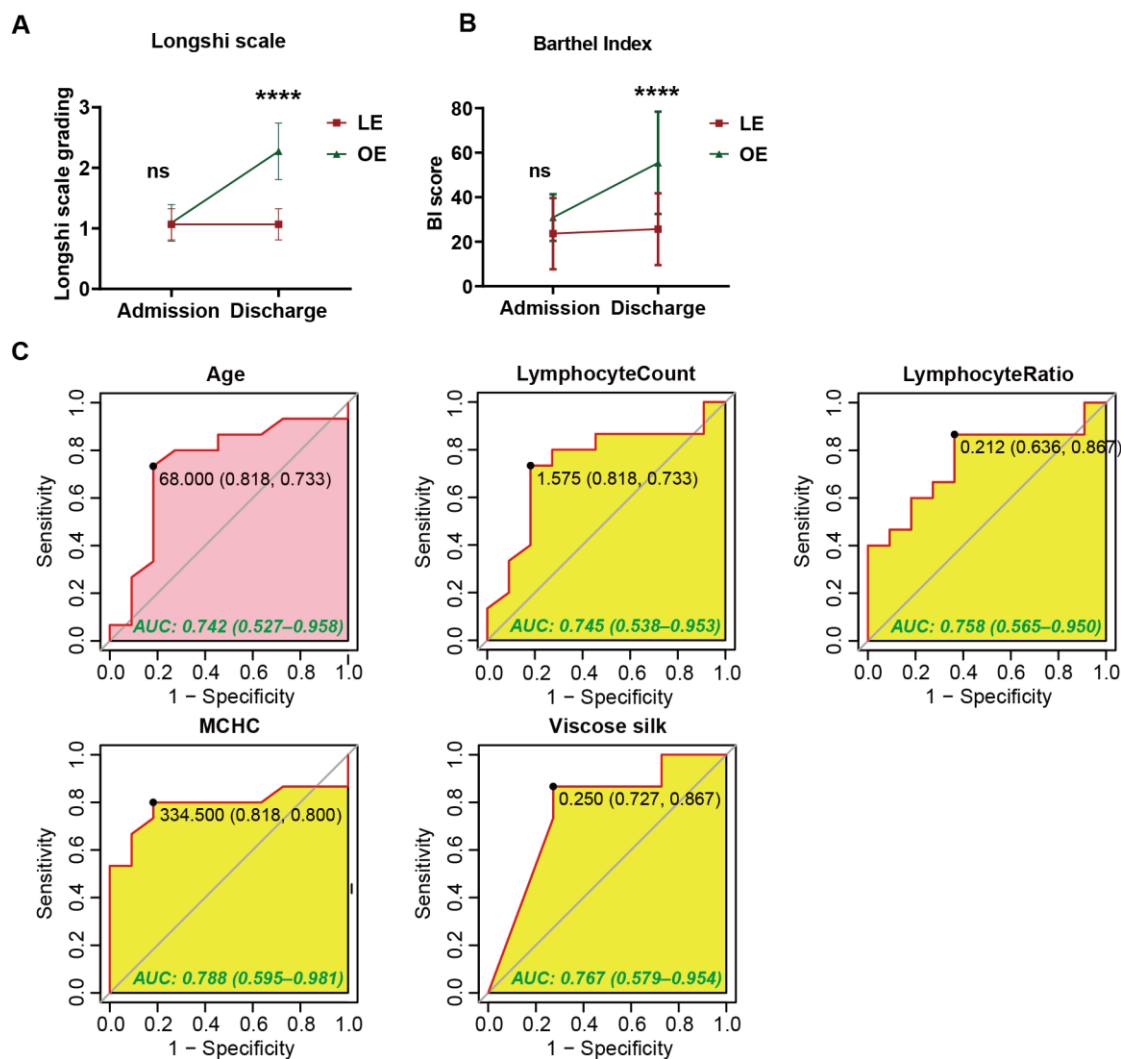

1

2 **FigS2. Supplementary figure corresponding to Figure 5.**

3 **A**, ADL assessment of the enrolled patients at admission and discharge by  
 4 Longshi scale in the LE (n=15) and OE (n=11); **B**, ADL assessment of the enrolled  
 5 patients at admission and discharge by Longshi scale, 1 = Bedridden group, 2 =  
 6 Domestic group; **C**, ROC analysis of Age, LymphocyteCount, LymphocyteRatio,  
 7 mean corpuscular hemoglobin concentration (MCHC), and Viscose silk for the  
 8 discrimination of LE/OE individuals, respectively.

9
